# Supplementary material for: Macrocyclic Peptidomimetic Plasmepsin X Inhibitors with Potent In Vitro and In Vivo Antimalarial Activity
Source: PubMed Central journal article supplement (PMC10424242; doi:10.1021/acs.jmedchem.3c00812), 2023-07-28
Supplement: jm3c00812_si_001.pdf [file jm3c00812_si_001.pdf]

## Supporting Information

### Macrocyclic peptidomimetic plasmepsin X inhibitors with potent *in vitro* and *in vivo* antimalarial activity

Vadims Kovada,<sup>a</sup> Chrislaine Withers-Martinez,<sup>b</sup> Raitis Bobrovs,<sup>a</sup> Helēna Cīrule,<sup>a</sup> Edgars Liepins,<sup>a</sup> Solveiga Grinberga,<sup>a</sup> Fiona Hackett,<sup>b</sup> Christine R. Collins,<sup>b</sup> Agrita Kreicberga,<sup>a</sup> María Belén Jiménez-Díaz,<sup>c</sup> Iñigo Angulo-Barturen,<sup>c</sup> Dace Rasina,<sup>a</sup> Edgars Suna,<sup>a</sup> Kristaps Jaudzems,<sup>a</sup> Michael J. Blackman,<sup>b,d\*</sup> and Aigars Jirgensons<sup>a\*</sup>

<sup>a</sup>Latvian Institute of Organic Synthesis, Riga LV-1006, Latvia;

<sup>b</sup>Malaria Biochemistry Laboratory, The Francis Crick Institute, London NW1 1AT, United Kingdom

<sup>c</sup>The Art of Discovery SL, Biscay Science and Technology Park, Derio 48160, Bizkaia, Basque Country, Spain

<sup>d</sup>Faculty of Infectious and Tropical Diseases, London School of Hygiene & Tropical Medicine, London WC1E 7HT, United Kingdom

e-mail: aigars@osi.lv; mike.blackman@crick.ac.uk

### Table of contents

|                                                                                        |     |
|----------------------------------------------------------------------------------------|-----|
| Synthesis of building blocks <b>23a-d</b> .....                                        | S2  |
| Synthesis of building blocks <b>26a-d</b> .....                                        | S3  |
| Synthesis of building blocks <b>38a,b</b> .....                                        | S5  |
| <sup>1</sup> H NMR and <sup>13</sup> C NMR spectra of products <b>7a-k</b> .....       | S7  |
| HPLC analysis of final products <b>7a-k</b> .....                                      | S27 |
| Therapeutic efficacy of inhibitor <b>7f</b> against <i>P. falciparum in vivo</i> ..... | S38 |

## Synthesis of building blocks 23a-d

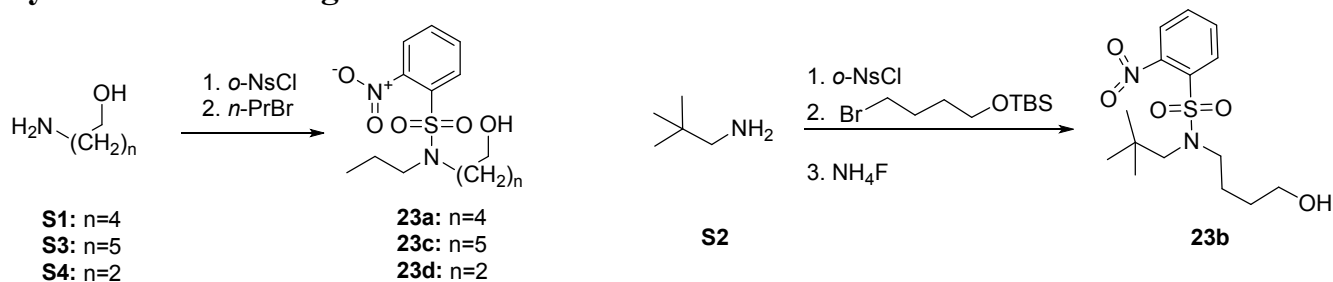

### General procedure for the synthesis of nosylated hydroxyamines

To an ice bath cooled solution of *o*-nitrobenzenesulfonyl chloride (1 equiv) in DCM (1.1 mL/1 mmol of the sulfonyl chloride) was added a solution of aminoalcohol (2 equiv) and triethylamine (3 equiv) in DCM (1.1 mL/1 mmol of the sulfonyl chloride). Ice bath was removed and the reaction mixture was allowed to warm to room temperature. After stirring at room temperature for 2 h, the reaction mixture was quenched with an aqueous 0.1M solution of HCl (20 mL). Phases were separated and the aqueous phase was extracted with DCM (3 x 15mL). The combined organic layers were washed with brine and dried over Na<sub>2</sub>SO<sub>4</sub>. All volatiles were removed under reduced pressure.

The crude protected aminoalcohol from previous step was dissolved in anhydrous DMF (4.4 mL/ 1 mmol of the sulfonyl chloride). 1-Bromopropane (3 equiv) was added, followed by K<sub>2</sub>CO<sub>3</sub> (6 equiv). The reaction mixture was stirred at room temperature overnight, quenched with water (30 mL) and extracted with DCM (3x30 mL). The combined organic phase was washed with brine, dried over anhydrous Na<sub>2</sub>SO<sub>4</sub>, and evaporated under reduced pressure.

*N*-(4-Hydroxybutyl)-2-nitro-*N*-propylbenzenesulfonamide (**23a**). The title compound was obtained as a light yellow oil (1.32 g, 93% yield) from 4-aminobutan-1-ol (**S1**) (803 mg, 9.00 mmol, 2 equiv), triethylamine (1.88 mL, 13.5 mmol, 3 equiv), *o*-nitrobenzenesulfonyl chloride (1.00 g, 4.51 mmol, 1 equiv), *n*-propyl bromide (1.23 mL, 13.5 mmol, 3 equiv) and K<sub>2</sub>CO<sub>3</sub> (3.7 g, 27.0 mmol, 6 equiv), following general procedure. Pure material was obtained by column chromatography on silica gel using 50% EtOAc in hexanes. <sup>1</sup>H NMR (400 MHz, Chloroform-*d*): δ 8.02 – 7.95 (m, 1H), 7.70 – 7.63 (m, 2H), 7.63 – 7.56 (m, 1H), 3.62 (t, *J* = 6.2 Hz, 2H), 3.35 – 3.28 (m, 2H), 3.27 – 3.20 (m, 2H), 1.69 (br s, 1H), 1.68 – 1.58 (m, 2H), 1.58 – 1.47 (m, 4H), 0.83 (t, *J* = 7.4 Hz, 3H). <sup>13</sup>C NMR (101 MHz, Chloroform-*d*): δ 148.1, 133.8, 133.5, 131.7, 130.7, 124.2, 62.3, 49.0, 47.2, 29.6, 24.8, 21.5, 11.1. HRMS-ESI (*m/z*) calcd. for C<sub>13</sub>H<sub>21</sub>N<sub>2</sub>O<sub>5</sub>S [M+H]<sup>+</sup> 317.1171. Found 317.1172.

*N*-(4-Hydroxybutyl)-*N*-neopentyl-2-nitrobenzenesulfonamide (**23b**). To an ice bath cooled solution of *o*-nitrobenzenesulfonyl chloride (500 mg, 2.26 mmol, 1 equiv) in DCM (5 mL) was added a solution of *neo*-pentyl amine (**S2**) (0.53 mL, 4.51 mmol, 2 equiv) and triethylamine (0.94 mL, 6.77 mmol, 3 equiv) in DCM (5 mL). Ice bath was removed and the reaction mixture was allowed to warm to room temperature. After stirring at room temperature for 2 h, the reaction mixture was quenched with a 0.1 M HCl solution (20 mL). Phases were separated and the aqueous phase was extracted with DCM (3 x 15mL). The combined organic phase was washed with brine and dried over Na<sub>2</sub>SO<sub>4</sub>. All volatiles were removed under reduced pressure. The crude amine from previous step was dissolved in anhydrous DMF (10 mL). (4-Bromobutoxy)(tert-butyl)dimethylsilane (1.12 g, 4.19 mmol, 2 equiv) was added, followed by NaOH (167 mg, 4.19 mmol, 2 equiv). The reaction mixture was stirred overnight at room temperature then quenched with water (30 mL) and extracted with diethylether (3x20 mL). The combined organic phase was washed with brine and dried over Na<sub>2</sub>SO<sub>4</sub>. All volatiles were

removed under reduced pressure. The residue was dissolved in MeOH (40 mL). Ammonium fluoride (1.16 g, 31.4 mmol, 15 equiv) was added and the reaction mixture was stirred at room temperature for 100 hours. Silica gel (5 g) was added and methanol was evaporated under reduced pressure. The residue was added to silica gel column and eluted with 30% EtOAc in hexanes. Collected product was reperfired by column chromatography on silica gel using 2% methanol in DCM. Product **23b** was collected as a yellowish oil (320 mg, 44% yield). <sup>1</sup>H NMR (400 MHz, Chloroform-*d*): δ 8.04 – 8.01 (m, 1H), 7.71 – 7.64 (m, 2H), 7.62 – 7.59 (m, 1H), 3.55 (t, *J* = 6.3 Hz, 2H), 3.41 – 3.35 (m, 2H), 3.18 (s, 2H), 1.64 – 1.54 (m, 2H), 1.45 – 1.35 (m, 2H), 0.96 (s, 9H). <sup>13</sup>C NMR (101 MHz, Chloroform-*d*): δ 148.3, 133.9, 133.6, 131.6, 131.2, 124.2, 62.38, 58.7, 49.3, 33.6, 29.8, 28.5, 23.8. HRMS-ESI (m/z) calcd. for C<sub>15</sub>H<sub>25</sub>N<sub>2</sub>O<sub>5</sub>S [M+H]<sup>+</sup> 345.1484. Found 345.1484.

*N*-(5-hydroxypentyl)-2-nitro-*N*-propylbenzenesulfonamide (**23c**). The title compound was obtained as a light yellow oil (1.31 mg, 87% yield) from 5-aminopentan-1-ol (**S3**) (931 mg, 9.02 mmol, 2.0 equiv), triethylamine (1.89 mL, 13.5 mmol, 3 equiv), *o*-nitrobenzenesulfonyl chloride (1.00 g, 4.51 mmol, 1 equiv), *n*-propyl bromide (1.24 mL, 13.6 mmol, 3 equiv), and K<sub>2</sub>CO<sub>3</sub> (3.77 g, 27.3 mmol, 6 equiv), following general procedure. Pure material was obtained by column chromatography on silica gel using 50% EtOAc in hexanes. <sup>1</sup>H NMR (400 MHz, Chloroform-*d*): δ 8.04 – 7.97 (m, 1H), 7.71 – 7.64 (m, 2H), 7.63 – 7.57 (m, 1H), 3.61 (td, *J* = 6.4, 0.9 Hz, 2H), 3.33 – 3.26 (m, 2H), 3.26 – 3.20 (m, 2H), 1.64 – 1.49 (m, 6H), 1.49 (br s, 1H), 1.39 – 1.29 (m, 2H), 0.85 (t, *J* = 7.3 Hz, 3H). <sup>13</sup>C NMR (101 MHz, Chloroform-*d*) δ 148.1, 134.0, 133.4, 131.6, 130.8, 124.2, 62.7, 49.1, 47.3, 32.3, 28.1, 22.9, 21.5, 11.2. HRMS-ESI (m/z) calcd. for C<sub>14</sub>H<sub>23</sub>N<sub>2</sub>O<sub>5</sub>S [M+H]<sup>+</sup> 331.1328. Found 331.1335.

*N*-(2-hydroxyethyl)-2-nitro-*N*-propylbenzenesulfonamide (**23d**). The title compound was obtained as a light yellow oil (607 mg, 93% yield) from 2-aminoethan-1-ol (**S4**) (276 mg, 4.51 mmol, 2 equiv), triethylamine (0.94 mL, 6.77 mmol, 3 equiv), *o*-nitrobenzenesulfonyl chloride (500 mg, 2.26 mmol, 1 equiv), *n*-propyl bromide (0.62 mL, 6.77 mmol, 3 equiv), and K<sub>2</sub>CO<sub>3</sub> (1.87 g, 13.5 mmol, 6 equiv), following general procedure. Pure material was obtained by column chromatography on silica gel using 50% EtOAc in hexanes. <sup>1</sup>H NMR (400 MHz, Chloroform-*d*): δ 8.04 – 7.97 (m, 1H), 7.72 – 7.64 (m, 2H), 7.64 – 7.57 (m, 1H), 3.71 (t, *J* = 5.6 Hz, 2H), 3.44 (t, *J* = 5.6 Hz, 2H), 3.33 – 3.24 (m, 2H), 1.63 – 1.50 (m, 2H), 0.83 (t, *J* = 7.4 Hz, 3H). <sup>13</sup>C NMR (101 MHz, Chloroform-*d*): δ 148.1, 133.7, 133.2, 131.9, 130.8, 124.2, 60.5, 50.2, 49.5, 21.5, 11.0. HRMS-ESI (m/z) calcd. for C<sub>11</sub>H<sub>17</sub>N<sub>2</sub>O<sub>5</sub>S [M+H]<sup>+</sup> 289.0858. Found 289.0862.

## Synthesis of building blocks 26a-d

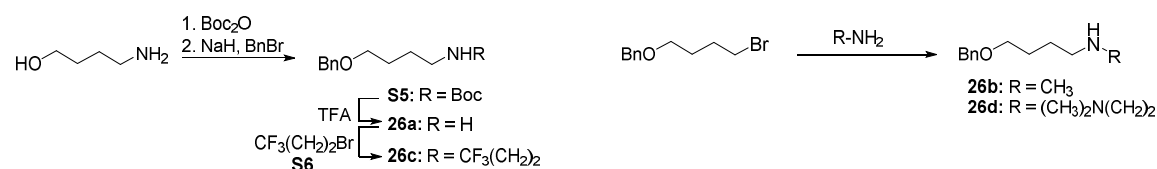

*Tert*-butyl (4-(benzyloxy)butyl)carbamate (**S5**). To a cooled 0°C solution of 4-amino-1-butanol (3.00 g, 33.7 mmol, 1 equiv) in DCM (25 mL) was added a solution of Boc<sub>2</sub>O (7.34 g, 33.7 mmol, 1 equiv) in DCM (5 mL). The reaction mixture was stirred at room temperature for 2 h. Solvent was evaporated under reduced pressure. The residue was dissolved in DMF (33 mL) and cooled to 0°C. NaH (60% in mineral oil) (2.69 g, 67.3 mmol, 2 equiv) and the reaction mixture was stirred at 0°C for 30 min before benzyl bromide (6.00 mL, 50.5 mmol, 1.5 equiv) was added. The reaction mixture was warmed to room temperature and stirred overnight. The

reaction was cooled to 0°C and quenched with water and extracted with EtOAc (3 x 50 mL). Combined organic phase was washed with brine, dried over anhydrous Na<sub>2</sub>SO<sub>4</sub>, and evaporated under reduced pressure. Purification by column chromatography on silica gel using gradient elution from 5% to 30% EtOAc in hexanes afforded product **S5** as a colorless oil (7.28 mg, 77% yield). <sup>1</sup>H NMR (400 MHz, Chloroform-*d*): δ 7.38 – 7.30 (m, 4H), 7.30 – 7.23 (m, 1H), 4.64 (br s, 1H), 4.50 (s, 2H), 3.48 (t, *J* = 6.1 Hz, 2H), 3.14 (q, *J* = 6.5 Hz, 2H), 1.70 – 1.53 (m, 4H), 1.44 (s, 9H). <sup>13</sup>C NMR (101 MHz, Chloroform-*d*): δ 156.1, 138.6, 128.5, 127.7, 127.7, 79.1, 73.1, 70.1, 40.5, 28.5, 27.2, 27.0.

*4-(Benzyloxy)butan-1-amine (26a)*. To a cooled solution of compound **S5** (7.27 g, 26.0 mmol, 1 equiv) trifluoroacetic acid (30.0 mL, 390 mmol, 15 equiv) was added, and the reaction mixture was stirred at 0°C for 1 h before volatiles were evaporated. The residue was neutralised with sat. aq. NaHCO<sub>3</sub>, extracted with EtOAc (3 x 50 mL), washed with brine, dried over anhydrous Na<sub>2</sub>SO<sub>4</sub>, and evaporated under reduced pressure, giving product **26a** as yellowish oil (4.43 g, 95% yield), which was used without further purification. <sup>1</sup>H NMR (400 MHz, Chloroform-*d*): δ 7.38 – 7.31 (m, 4H), 7.31 – 7.25 (m, 1H), 4.50 (s, 2H), 3.49 (t, *J* = 6.4 Hz, 2H), 2.71 (t, *J* = 7.0 Hz, 2H), 1.70 – 1.62 (m, 2H), 1.57 – 1.48 (m, 2H). <sup>13</sup>C NMR (101 MHz, Chloroform-*d*) δ 138.7, 128.5, 127.75, 127.65, 73.1, 70.4, 42.2, 30.7, 27.3.

*4-(Benzyloxy)-N-methylbutan-1-amine (26b)*. 4-(Benzyloxy)-1-bromobutane (165 μL, 0.87 mmol, 1 equiv) was added to a 33% solution of methyl amine in EtOH (5.40 mL, 43.4 mmol, 50 equiv). The reaction mixture was stirred at RT for 4 h. Volatiles were evaporated under reduced pressure. The residue was dissolved in diethyl ether (20 mL), washed with aqueous 1M NaOH, brine, dried over anhydrous Na<sub>2</sub>SO<sub>4</sub>, and evaporated under reduced pressure. Crude amine **26b** (145 mg, 87% yield) was used in the next step without purification. <sup>1</sup>H NMR (300 MHz, Chloroform-*d*): δ 7.41 – 7.27 (m, 5H), 4.50 (s, 2H), 3.56 (t, *J* = 5.8 Hz, 2H), 2.95 (t, *J* = 7.2 Hz, 2H), 2.48 (s, 3H), 1.99 (p, *J* = 7.2 Hz, 2H), 1.82 – 1.70 (m, 2H).

*4-(Benzyloxy)-N-(3,3,3-trifluoropropyl)butan-1-amine (26c)*. To a solution of 3-bromo-1,1,1-trifluoropropane (**S6**) (230 mg, 1.30 mmol, 1 equiv) in MeCN (12 mL) was added amine **26a** (1.17 g, 6.5 mmol, 5 equiv). The reaction mixture was stirred at room temperature overnight. Volatiles were evaporated under reduced pressure. The residue was dissolved in DCM (20 mL), washed with aqueous 1M NaOH (20 mL). Aqueous phase was separated and extracted with DCM (2x20 mL). Combined organic phase was washed with brine (20 mL), dried over anhydrous Na<sub>2</sub>SO<sub>4</sub>, and evaporated under reduced pressure. Purification by column chromatography on silica gel using DCM:MeOH:triethylamine (100:5:1 v/v/v) afforded amine **26c** as a colorless oil (170 mg, 48% yield), as well as unreacted excess of amine **26a**. <sup>1</sup>H NMR (400 MHz, Chloroform-*d*): δ 7.38 – 7.27 (m, 5H), 4.50 (s, 2H), 3.49 (t, *J* = 6.2 Hz, 2H), 2.85 (dd, *J* = 7.6, 6.9 Hz, 2H), 2.64 (t, *J* = 6.9 Hz, 2H), 2.27 (qdd, *J* = 11.0, 7.6, 6.9 Hz, 2H), 1.70 – 1.51 (m, 4H). <sup>13</sup>C NMR (101 MHz, Chloroform-*d*): δ 138.6, 128.5, 127.8, 127.7, 126.8 (q, *J* = 276.5 Hz), 73.1, 70.3, 49.7, 42.7 (q, *J* = 3.4 Hz), 34.4 (q, *J* = 27.5 Hz), 27.6, 26.9.

*N<sup>1</sup>-(4-(Benzyloxy)butyl)-N<sup>2</sup>,N<sup>2</sup>-dimethylethane-1,2-diamine (26d)*. To a solution of 4-(benzyloxy)-1-bromobutane (2.56 g, 10.5 mmol, 1 equiv) in MeCN (100 mL) was added N<sup>1</sup>,N<sup>1</sup>-dimethylethane-1,2-diamine (5.80 mL, 52.6 mmol, 5 equiv). The reaction mixture was stirred at room temperature overnight. Volatiles were evaporated under reduced pressure. The residue was dissolved in DCM (40 mL), washed with aqueous 1M NaOH (40 mL). Aqueous phase was separated and extracted with DCM (2 x 40 mL). Combined organic phase was washed with brine (20 mL), dried over anhydrous Na<sub>2</sub>SO<sub>4</sub>, and evaporated under reduced pressure. Crude amine

**26d** (1.8 g, 68% yield) was used in the next step without purification.  $^1\text{H}$  NMR (300 MHz, Chloroform-*d*):  $\delta$  7.38 – 7.23 (m, 5H), 4.50 (s, 2H), 3.52 – 3.45 (m, 2H), 2.70 – 2.60 (m, 4H), 2.39 (t,  $J = 6.2$  Hz, 2H), 2.21 (s, 6H), 1.72 – 1.51 (m, 4H).

## Synthesis of building blocks **38a,b**

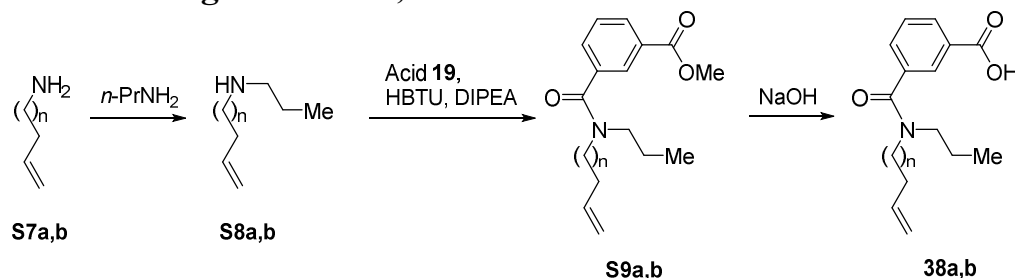

**S7a-S9a, 38a:**  $n = 1$   
**S7b-S9b, 38b:**  $n = 2$

### General procedure for the synthesis of amides

Solution of carboxylic acid (1-2 equiv) in anhydrous DCM (1 mL/ 0.1 mmol of the acid) was cooled to 0°C. DIPEA (1-4 equiv) was added, followed by HBTU (1-2 equiv). The reaction mixture was stirred at 0°C for 10 minutes. A solution of the amine (1-2 equiv) in DCM (1 mL/ 0.2 mmol) was added, and the reaction mixture was allowed to warm up to room temperature and stirred for 30 minutes. Solvent was evaporated under reduced pressure. The residue was dissolved in EtOAc (40 mL), and the solution was washed with 1M HCl (40 mL), 1M NaOH (40 mL), brine (40 mL), dried over anhydrous  $\text{Na}_2\text{SO}_4$ , and evaporated under reduced pressure.

### General procedure for the hydrolysis of methylbenzoates

An aqueous 1M solution of NaOH (2-6 equiv) was added to a solution of benzoate (1.0 equiv) in THF (2.5 mL/0.1 mmol of the benzoate). The resulting solution was stirred until conversion of starting material is complete. Solvent was evaporated under reduced pressure.

*Methyl 3-(but-3-en-1-yl(propyl)carbamoyl)benzoate (S9a)*. 4-Bromobut-1-ene (**S7a**) (526  $\mu\text{L}$ , 5.19 mmol, 1 equiv) was added to *n*-propylamine (12.8 mL, 155 mmol, 30 equiv) dropwise at room temperature. The mixture was stirred at room temperature overnight. Volatiles were evaporated under reduced pressure, giving crude amine **S8a** (contains 357 mg of **S8a**, 61% yield), which was used in the next step without further purification. The title compound was obtained as colorless oil (373 mg, 43% yield) from acid **19** (1.14 g, 6.31 mmol, 2 equiv), HBTU (2.39 g, 6.31 mmol, 2 equiv), DIPEA (2.18 mL, 12.6 mmol, 4 equiv) and crude amine from previous step (357 mg, 3.15 mmol, 1 equiv), following general procedure for the synthesis of amides. Pure material was obtained by column chromatography on silica gel using gradient elution from DCM to 4% MeOH in DCM.  $^1\text{H}$  NMR (400 MHz, Methanol-*d*<sub>4</sub>) for 2 rotamers:  $\delta$  8.13 – 8.08 (m, 1H), 8.01 – 7.96 (m, 1H), 7.64 – 7.56 (m, 2H), 5.99 – 5.83 (m, 0.5H), 5.66 – 5.50 (m, 0.5H), 5.24 – 5.06 (m, 1H), 5.05 – 4.94 (m, 1H), 3.93 (s, 3H), 3.60 (t,  $J = 7.2$  Hz, 1H), 3.50 (t,  $J = 7.6$  Hz, 1H), 3.34 – 3.32 (m, 1H), 3.20 (t,  $J = 7.6$  Hz, 1H), 2.47 (q,  $J = 7.2$  Hz, 1H), 2.28 (q,  $J = 7.5$  Hz, 1H), 1.74 (h,  $J = 7.2$  Hz, 1H), 1.57 (h,  $J = 7.3$  Hz, 1H), 1.01 (t,  $J = 7.4$  Hz, 1.3H), 0.74 (t,  $J = 7.4$  Hz, 1.7H).  $^{13}\text{C}$  NMR (101 MHz, Methanol-*d*<sub>4</sub>) for 2 rotamers:  $\delta$  173.0, 167.6, 138.5, 136.7, 135.6, 132.2, 132.1, 131.8, 131.4, 130.1, 128.6, 128.5, 118.0, 117.3, 52.9, 52.3, 50.0, 48.0, 45.5, 34.0, 33.0, 22.8, 21.6, 11.6, 11.2. HRMS-ESI ( $m/z$ ) calcd. for  $\text{C}_{16}\text{H}_{22}\text{NO}_3$   $[\text{M}+\text{H}]^+$  276.1600. Found 276.1610.

*Methyl 3-(pent-4-en-1-yl(propyl)carbamoyl)benzoate (S9b)*. 5-Bromopent-1-ene (**S7b**) (794  $\mu$ L, 6.71 mmol, 1 equiv) was added to *n*-propylamine (16.5 mL, 201 mmol, 30 equiv) dropwise at room temperature. The mixture was stirred at room temperature overnight. Volatiles were evaporated under reduced pressure, giving crude amine **S8b** (contains 850 mg of **S8b**, 86% yield), which was used in the next step without further purification. The title compound was obtained as colorless oil (1.10 g, 66% yield) from acid **19** (1.04 g, 5.78 mmol, 1 equiv), HBTU (2.19 g, 5.78 mmol, 1 equiv), DIPEA (4.00 mL, 23.1 mmol, 4 equiv) and crude amine from previous step (735 mg, 5.78 mmol, 1 equiv), following general procedure for the synthesis of amides. Pure material was obtained by column chromatography on silica gel using 30% EtOAc in hexanes.  $^1\text{H}$  NMR (600 MHz, Methanol- $d_4$ ) for 2 rotamers:  $\delta$  8.15 – 8.07 (m, 1H), 7.98 (s, 1H), 7.64 – 7.56 (m, 2H), 5.90 (dq,  $J = 16.8, 8.4, 7.6$  Hz, 0.5H), 5.59 (dq,  $J = 16.7, 8.3, 7.5$  Hz, 0.5H), 5.10 (d,  $J = 17.1$  Hz, 1H), 5.01 (d,  $J = 10.2$  Hz, 1H), 4.90 – 4.80 (m, 1H), 3.93 (s, 3H), 3.53 (t,  $J = 7.6$  Hz, 1H), 3.49 (t,  $J = 7.7$  Hz, 1H), 3.26 – 3.18 (m, 2H), 2.17 (q,  $J = 7.3$  Hz, 1H), 1.88 (q,  $J = 7.2$  Hz, 1H), 1.81 (p,  $J = 7.3$  Hz, 1H), 1.73 (h,  $J = 7.2$  Hz, 1H), 1.65 (p,  $J = 7.7$  Hz, 1H), 1.57 (h,  $J = 7.5$  Hz, 1H), 1.00 (t,  $J = 7.5$  Hz, 2H), 0.74 (t,  $J = 7.4$  Hz, 2H).  $^{13}\text{C}$  NMR (151 MHz, Methanol- $d_4$ ) for 2 rotamers:  $\delta$  172.9, 167.6, 139.1, 138.5, 138.3, 132.1, 131.8, 131.4, 130.2, 128.41, 128.37, 115.8, 115.6, 52.9, 52.3, 50.0, 48.1, 46.0, 32.3, 31.6, 28.8, 27.7, 22.9, 21.7, 11.7, 11.2. HRMS-ESI ( $m/z$ ) calcd. for  $\text{C}_{17}\text{H}_{24}\text{NO}_3$  [ $\text{M}+\text{H}$ ] $^+$  290.1756. Found 290.1761.

*3-(But-3-en-1-yl(propyl)carbamoyl)benzoic acid (38a)*. The hydrolysis of methyl benzoate was performed using compound **S9a** (180 mg, 0.654 mmol, 1 equiv), 1M solution of NaOH (1.3 mL, 1.3 mmol, 2 equiv), following general procedure for the hydrolysis of methyl benzoates. Full conversion was achieved after stirring at 60°C for 2 h. Crude acid was used in the next step without further purification.

*3-(Pent-4-en-1-yl(propyl)carbamoyl)benzoic acid (38b)*. The hydrolysis of methyl benzoate was performed using compound **S9b** (250 mg, 0.865 mmol, 1 equiv), 1M solution of NaOH (1.73 mL, 1.73 mmol, 2 equiv), following general procedure for the hydrolysis of methyl benzoates. Full conversion was achieved after stirring at 60°C for 2 h. Crude acid was used in the next step without further purification.  $^1\text{H}$  NMR (400 MHz, Methanol- $d_4$ ) for 2 rotamers:  $\delta$  8.11 (ddd,  $J = 6.4, 2.5, 1.7$  Hz, 1H), 7.99 (q,  $J = 1.3$  Hz, 1H), 7.63 – 7.54 (m, 2H), 6.00 – 5.83 (m, 0.5H), 5.67 – 5.53 (m, 0.5H), 5.14 – 4.98 (m, 1H), 3.51 (dt,  $J = 14.8, 7.5$  Hz, 2H), 3.28 – 3.18 (m, 2H), 2.17 (q,  $J = 7.5$  Hz, 1H), 1.95 – 1.85 (m, 1H), 1.87 – 1.75 (m, 1H), 1.76 – 1.69 (m, 1H), 1.69 – 1.61 (m, 1H), 1.57 (s, 1H), 1.00 (t,  $J = 7.4$  Hz, 1.5H), 0.74 (t,  $J = 7.4$  Hz, 1.5H).

# $^1\text{H}$ NMR and $^{13}\text{C}$ NMR spectra of products 7a–k

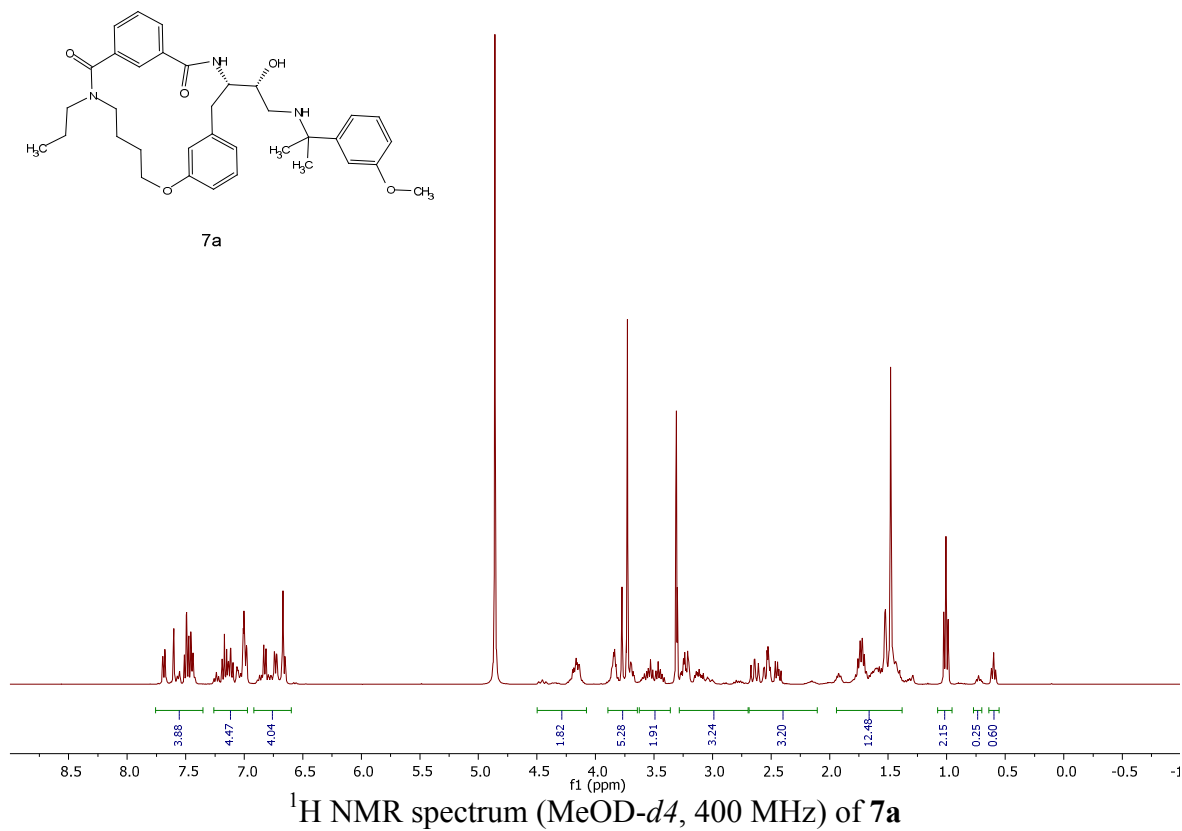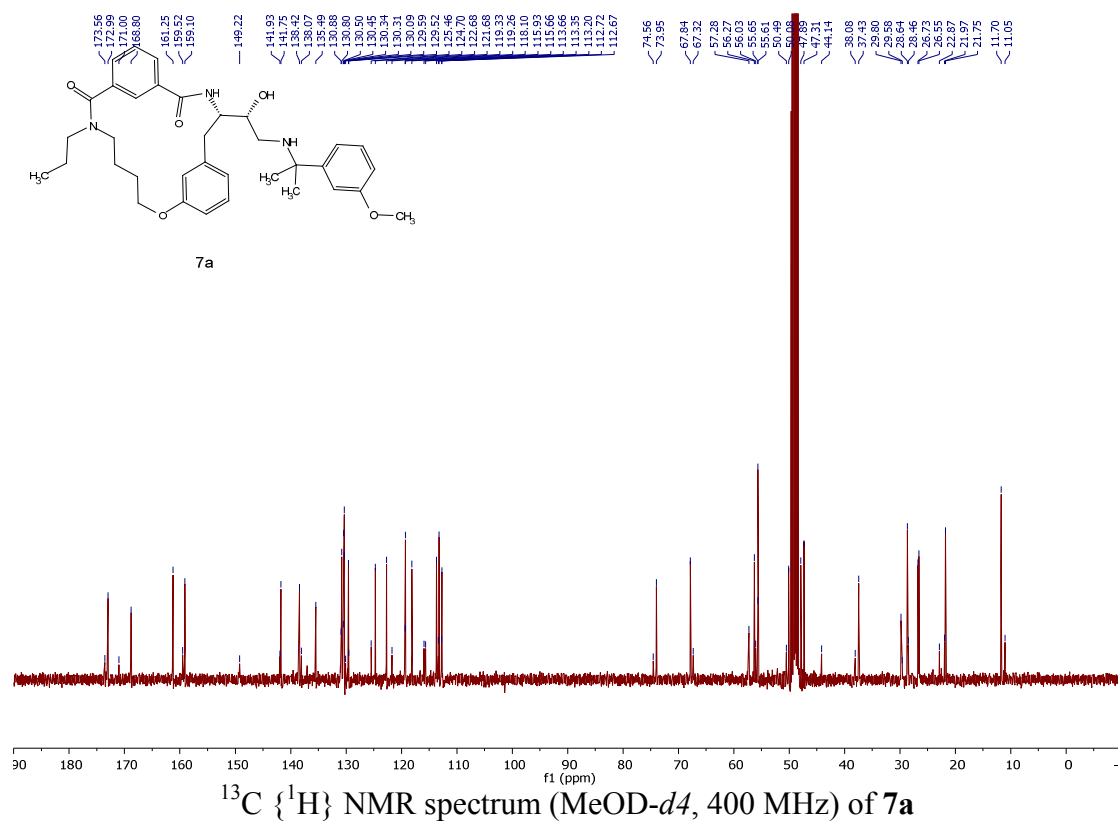

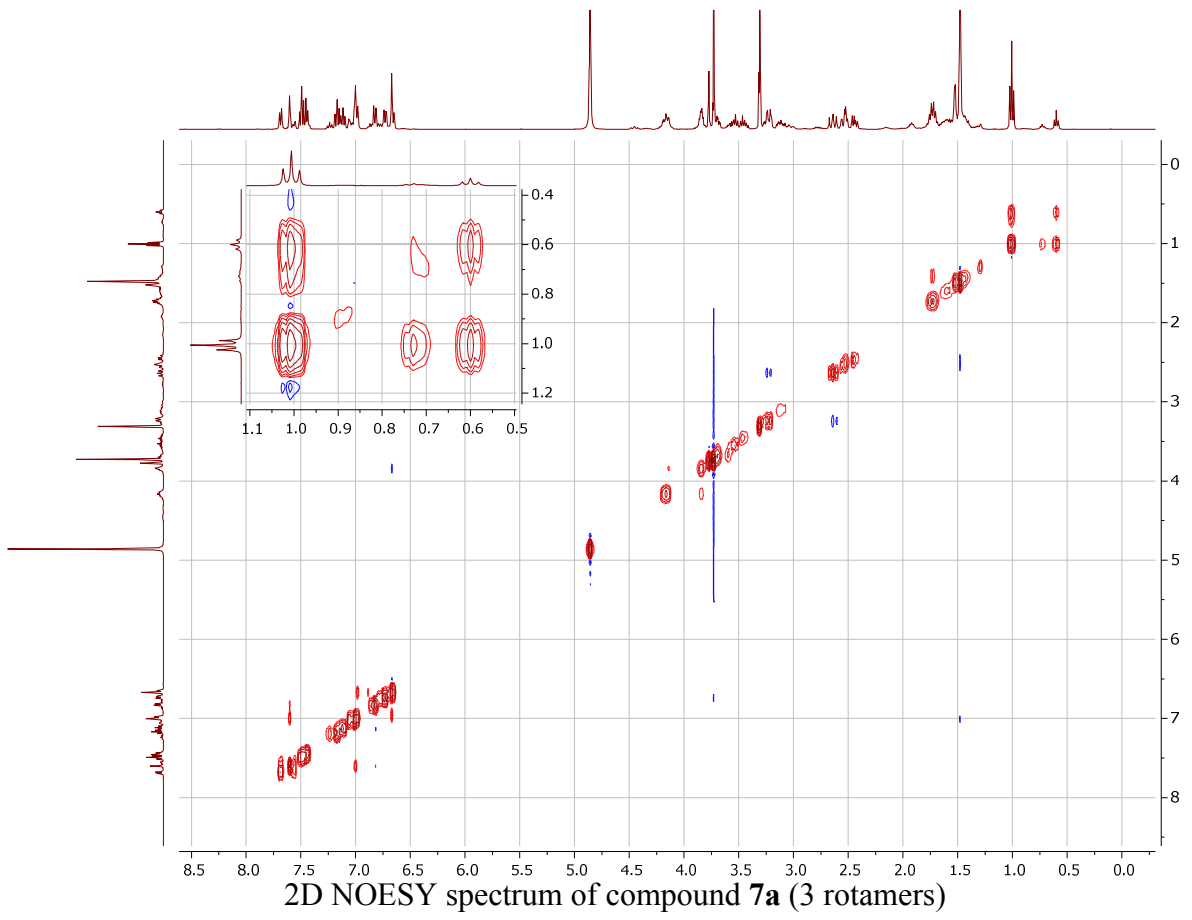



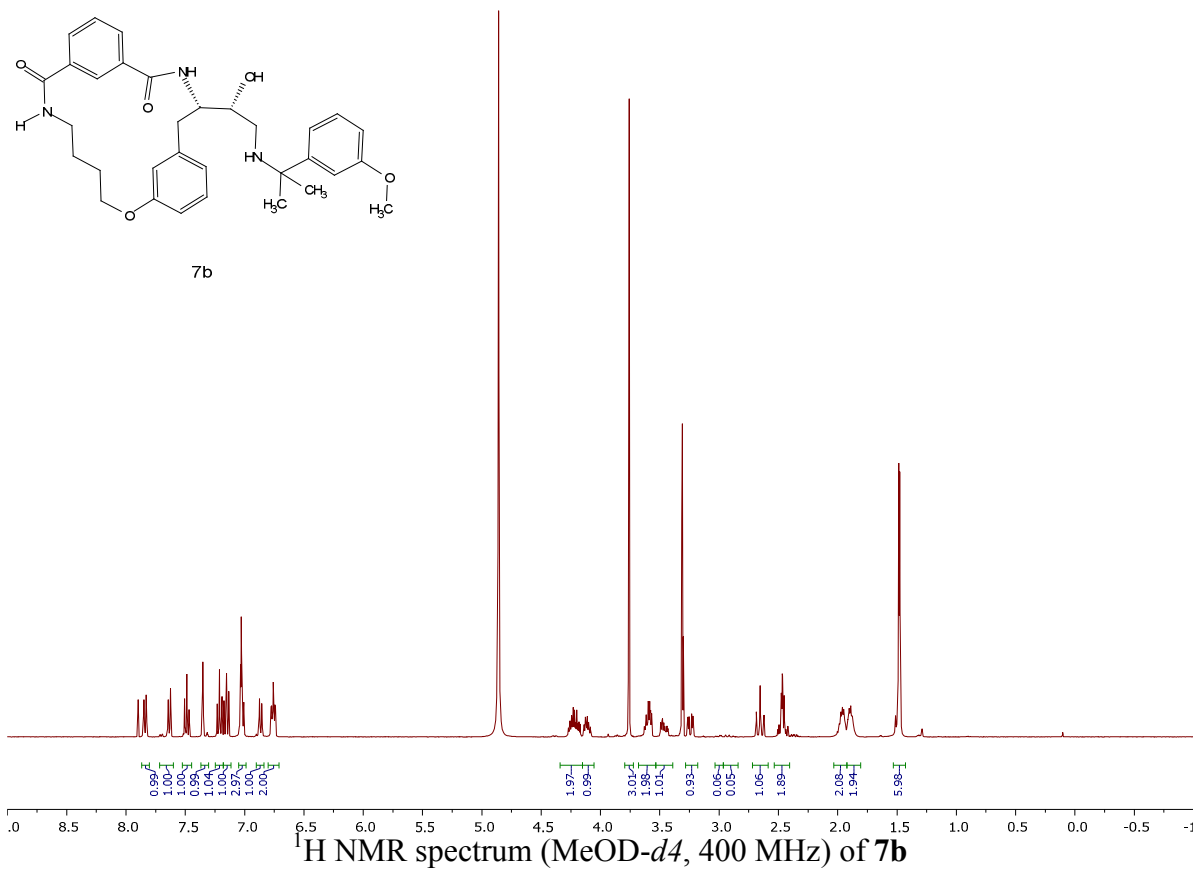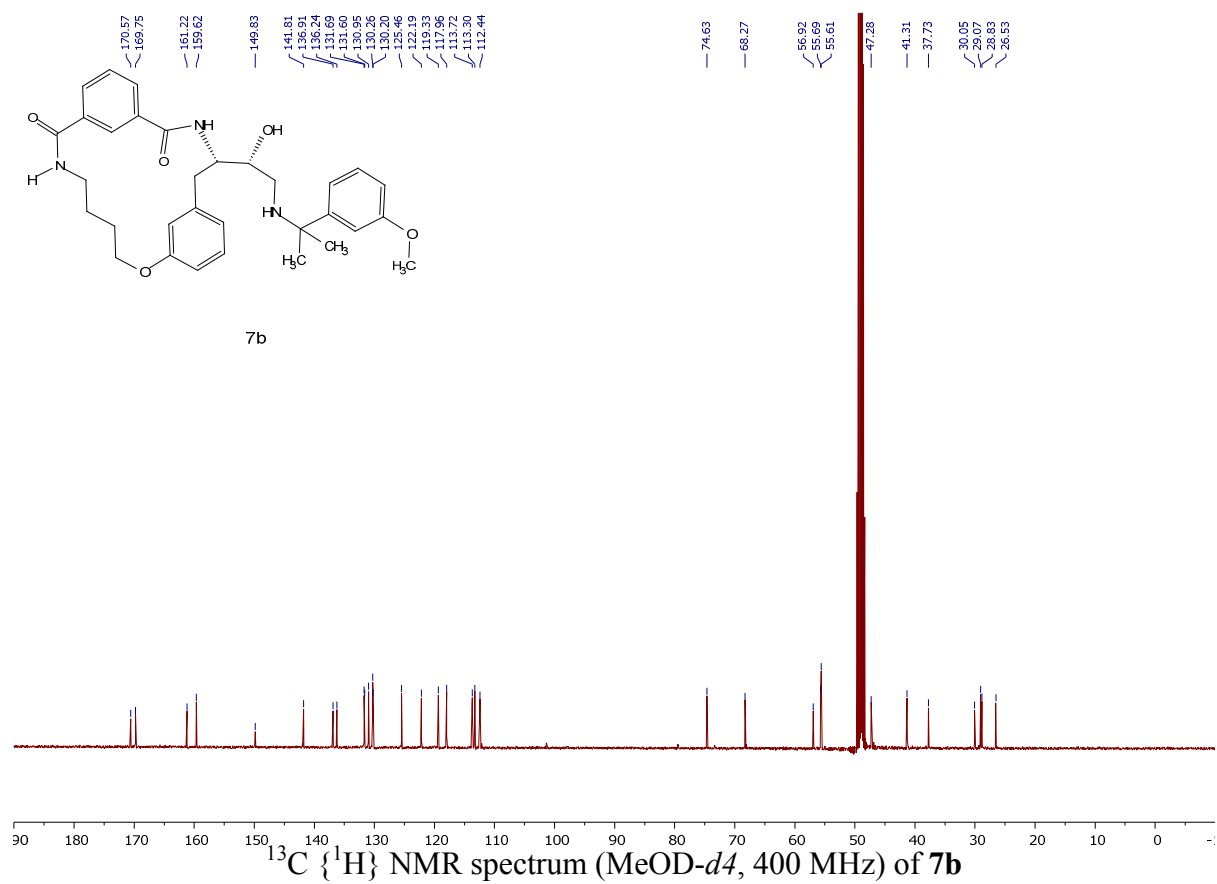

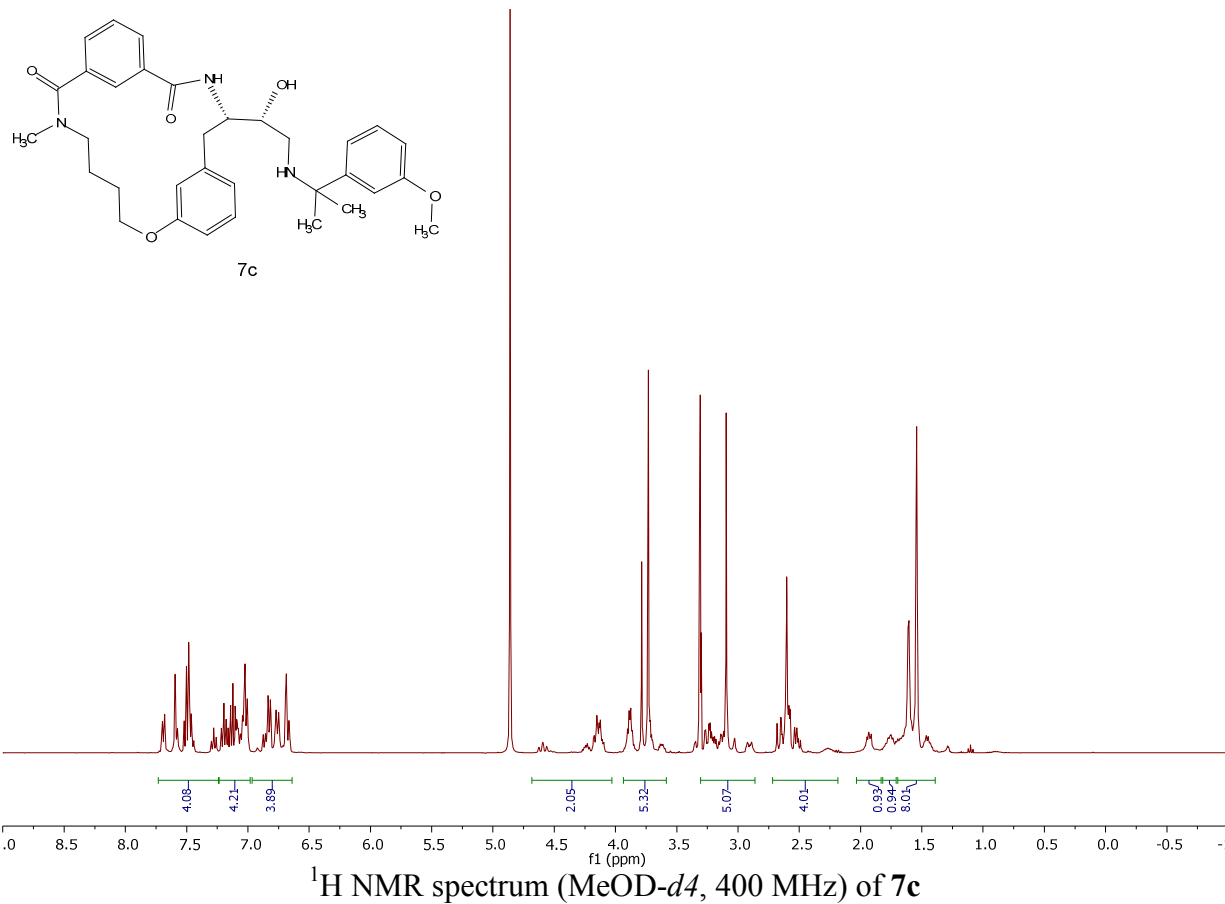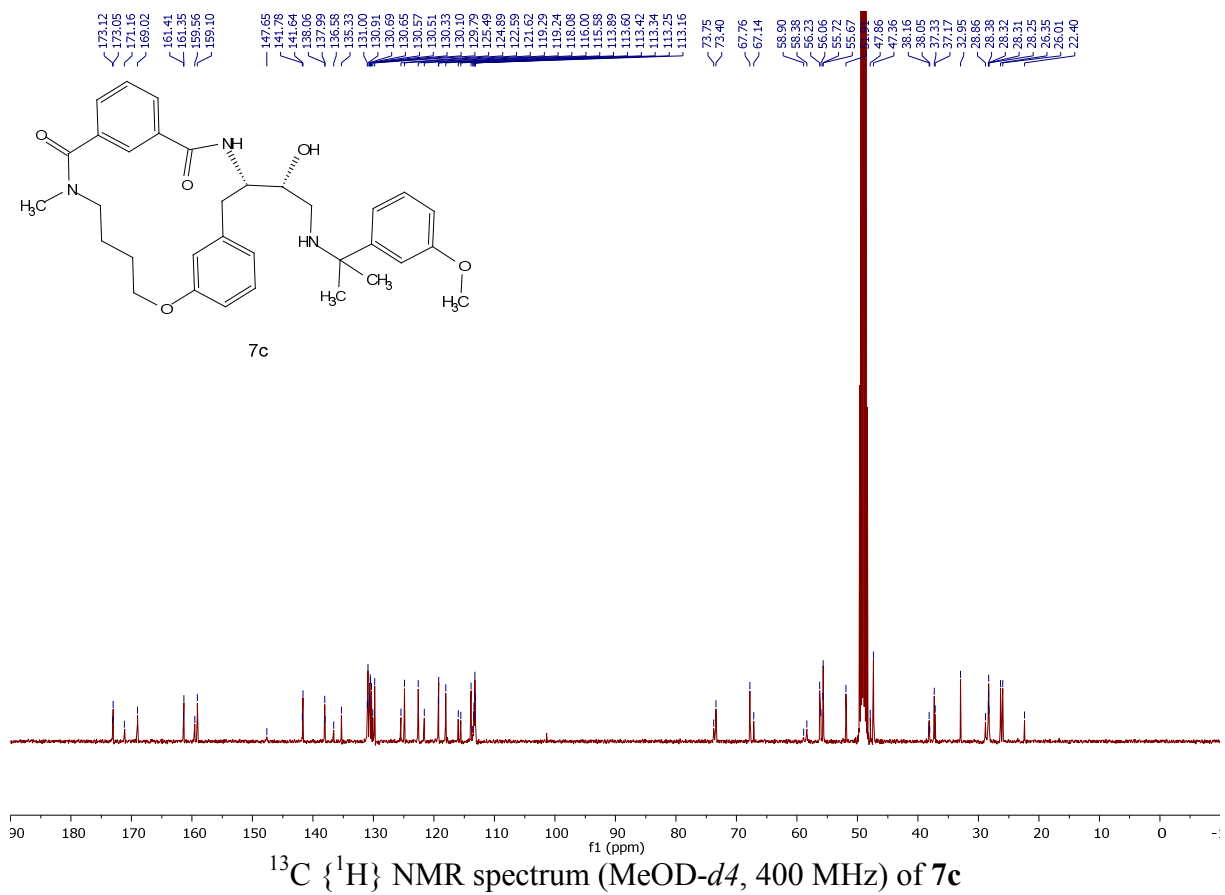

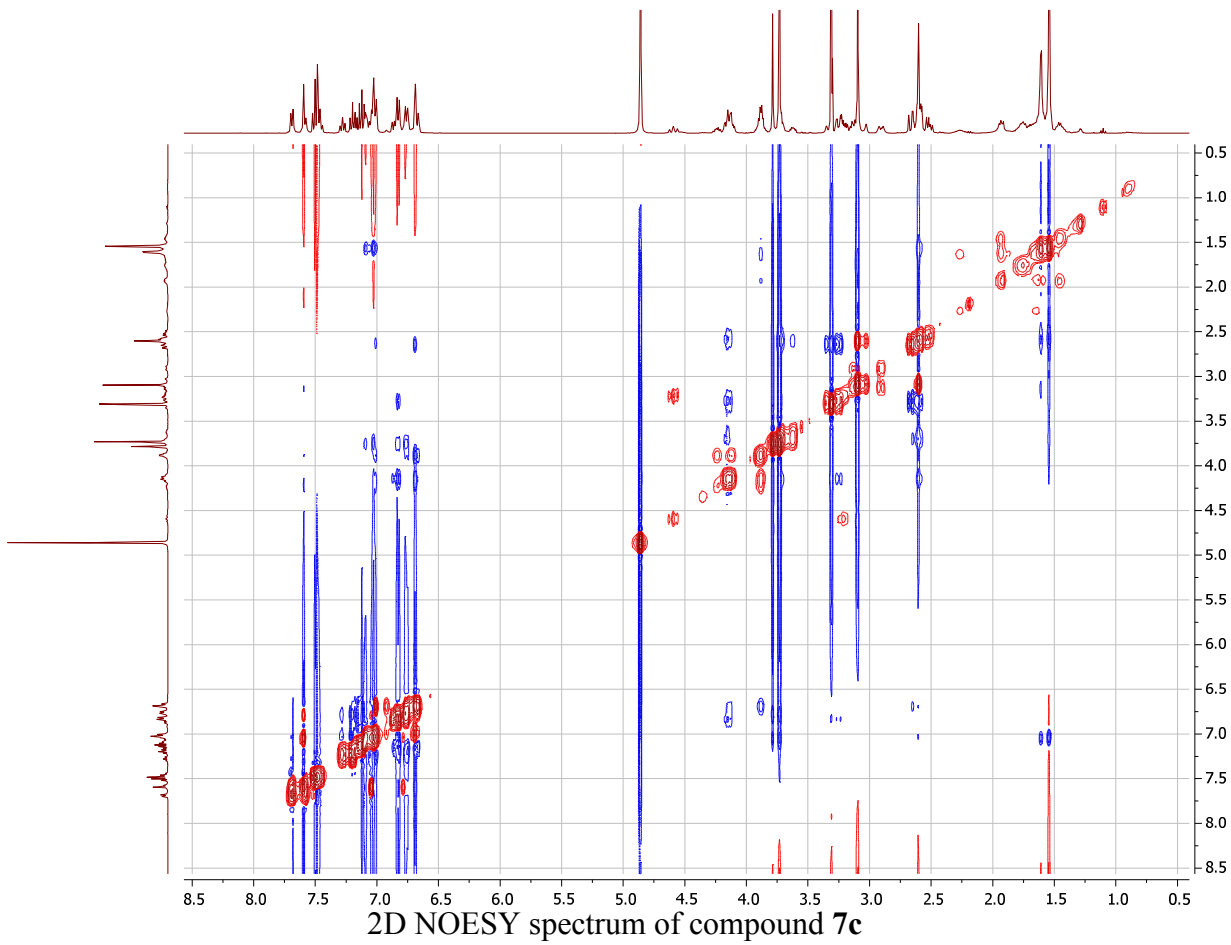

2D NOESY spectrum of compound 7c

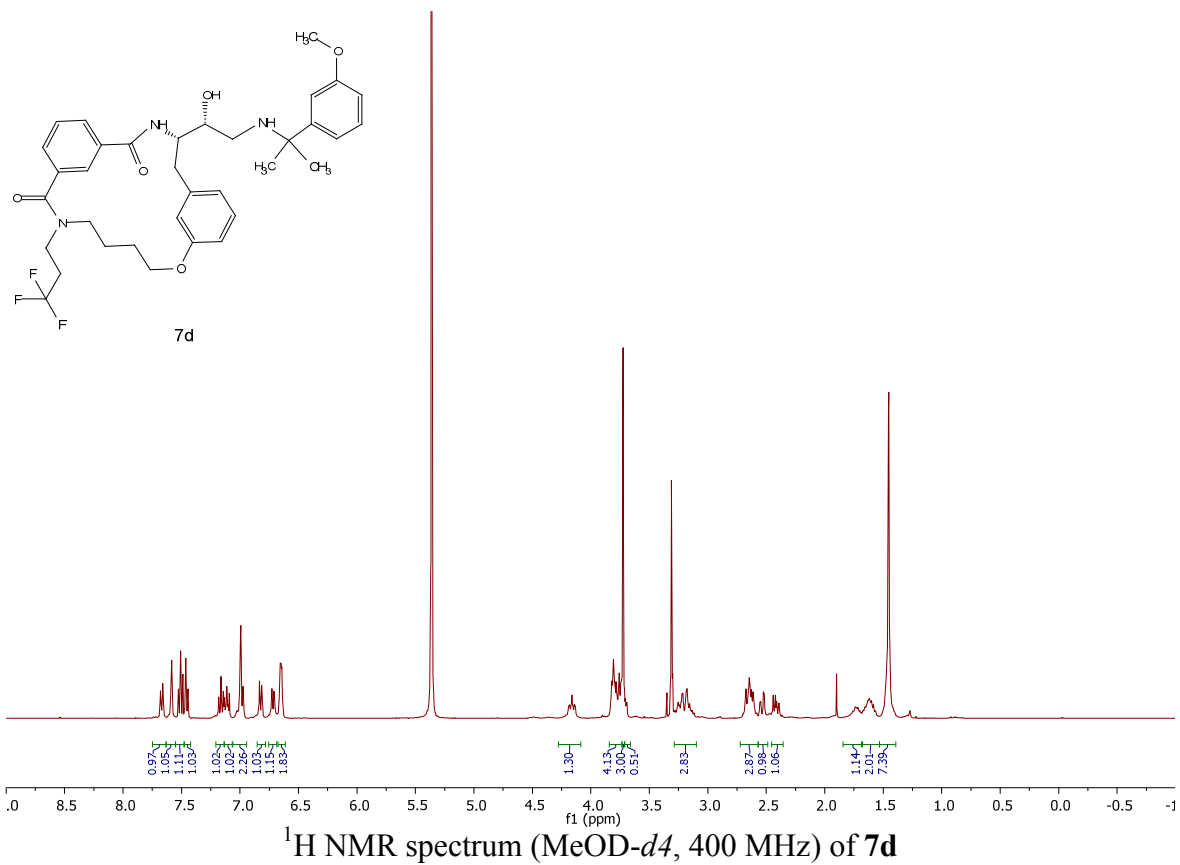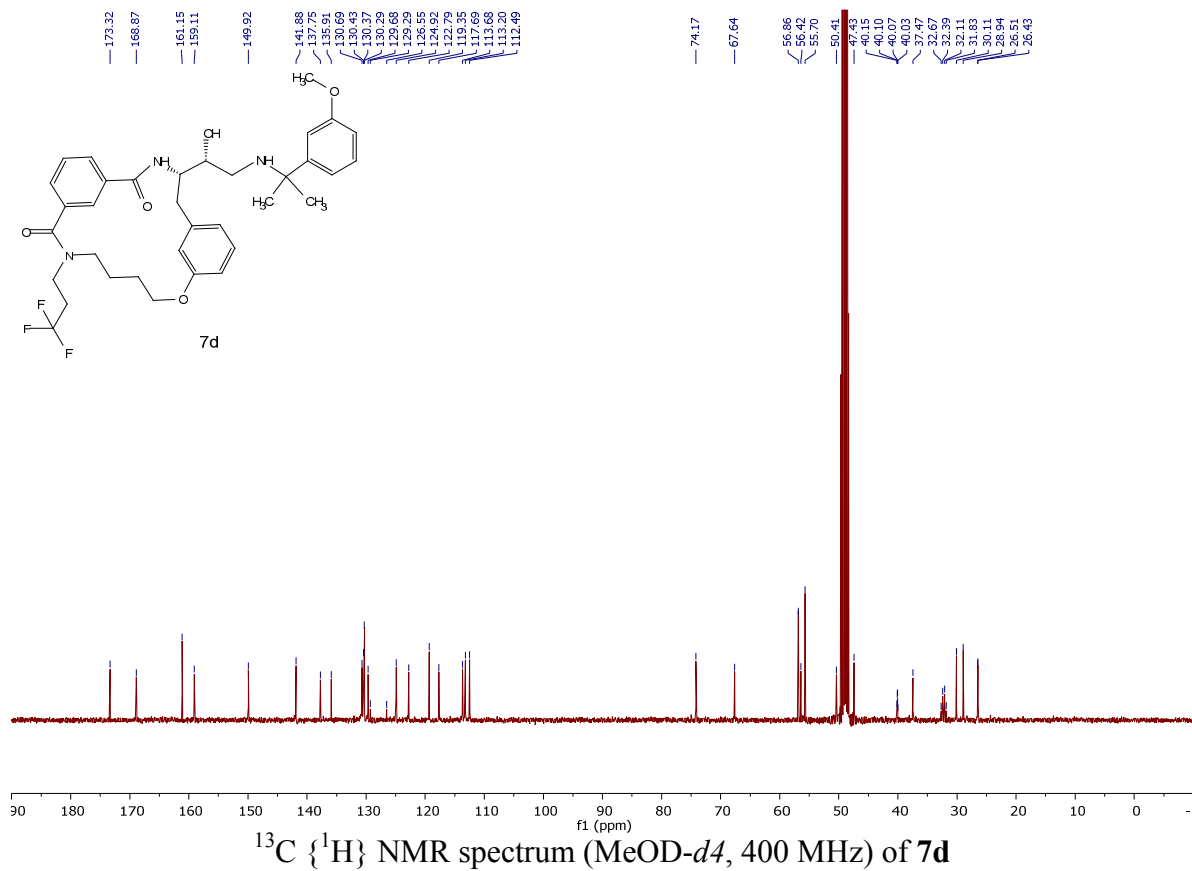

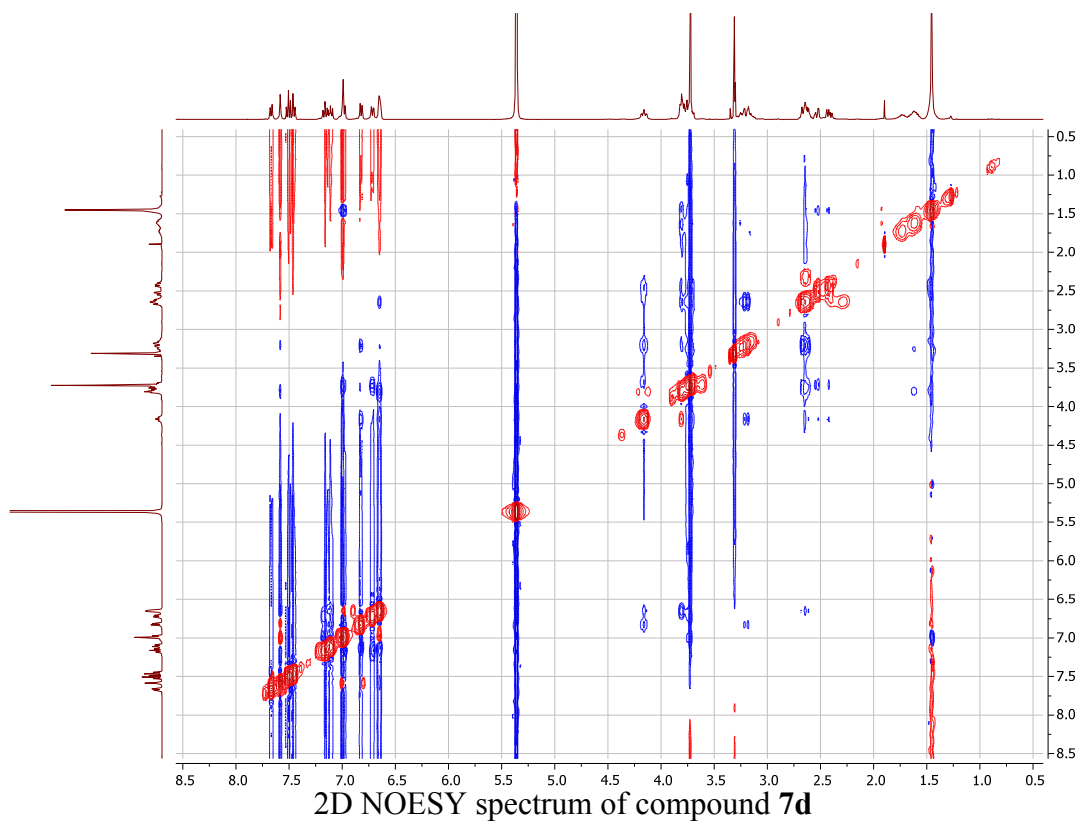

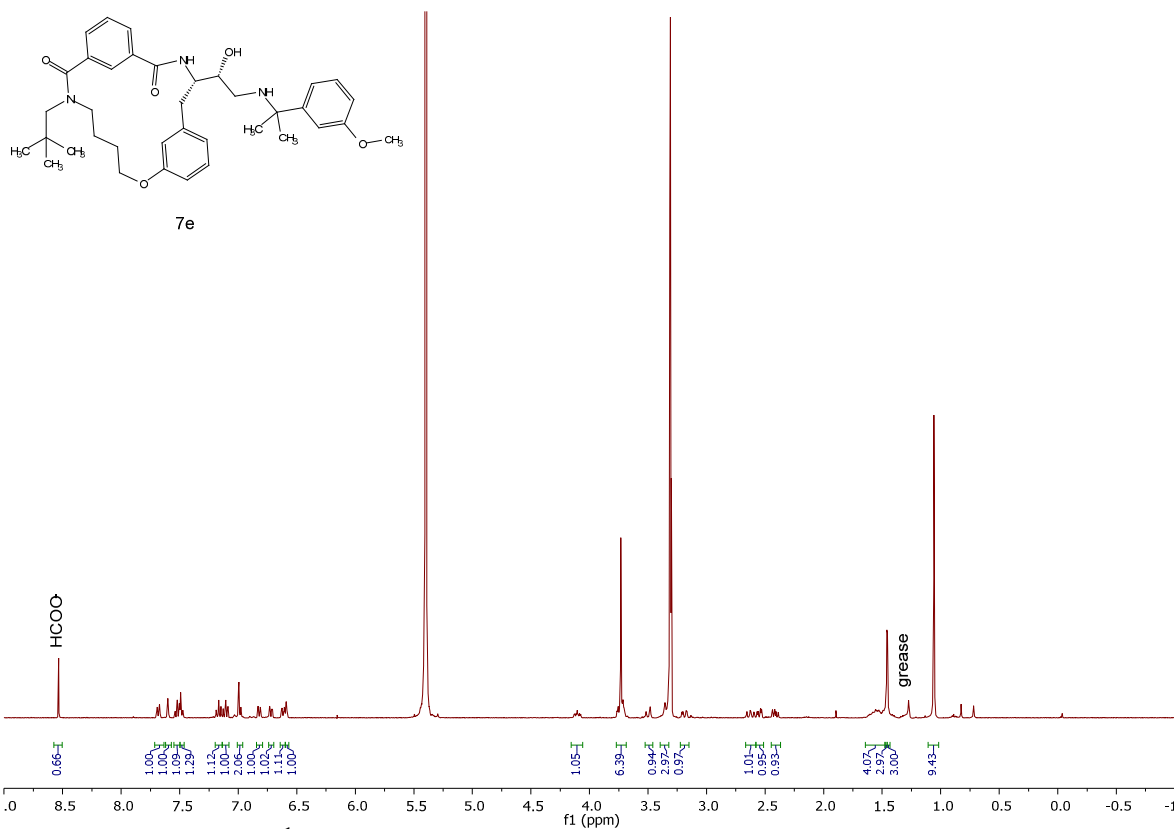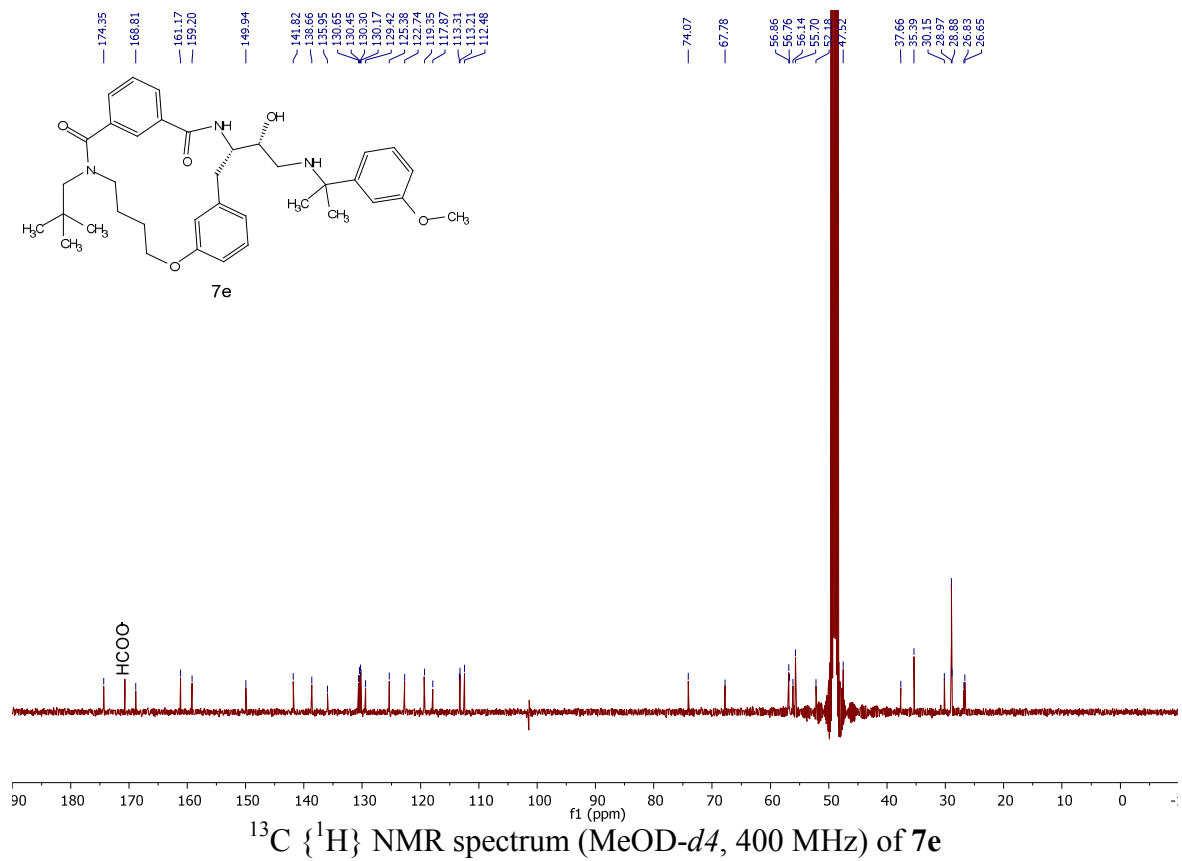

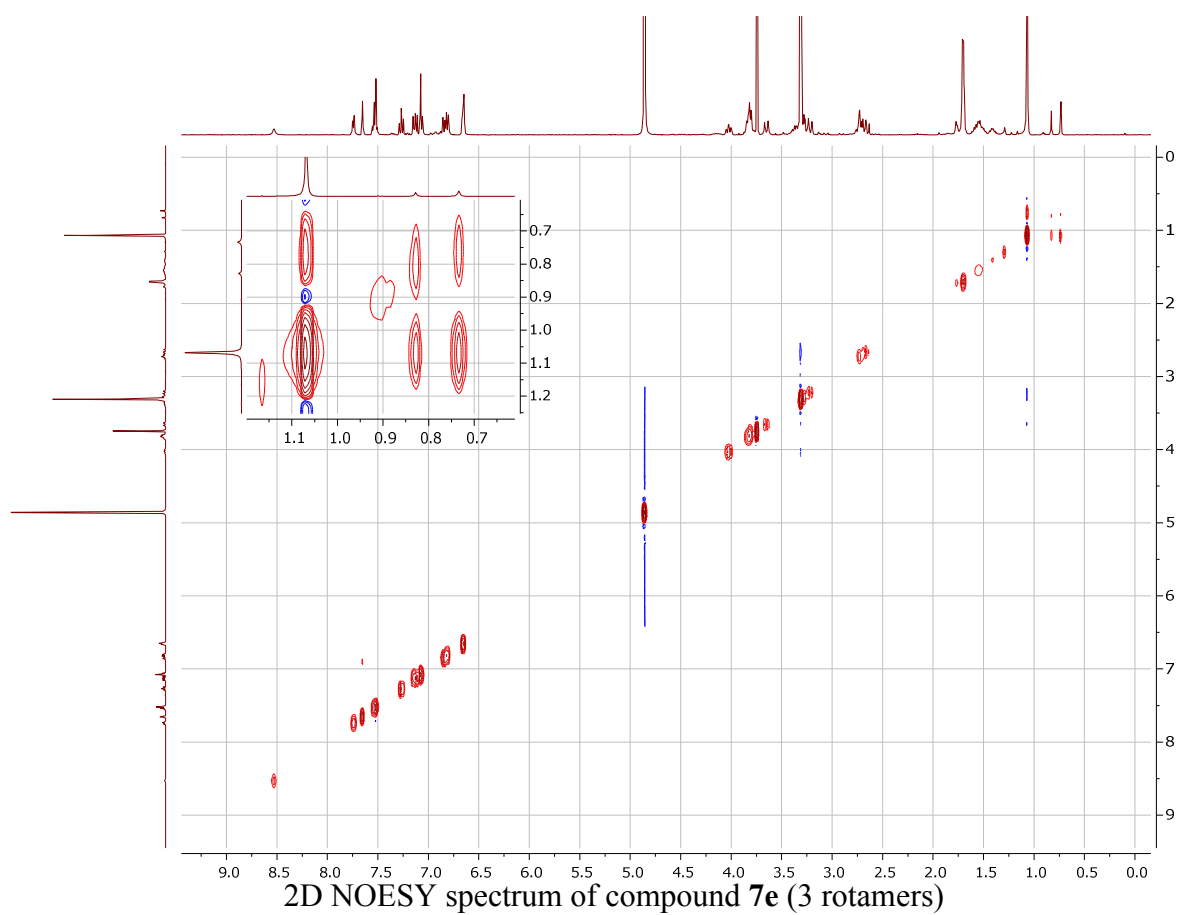

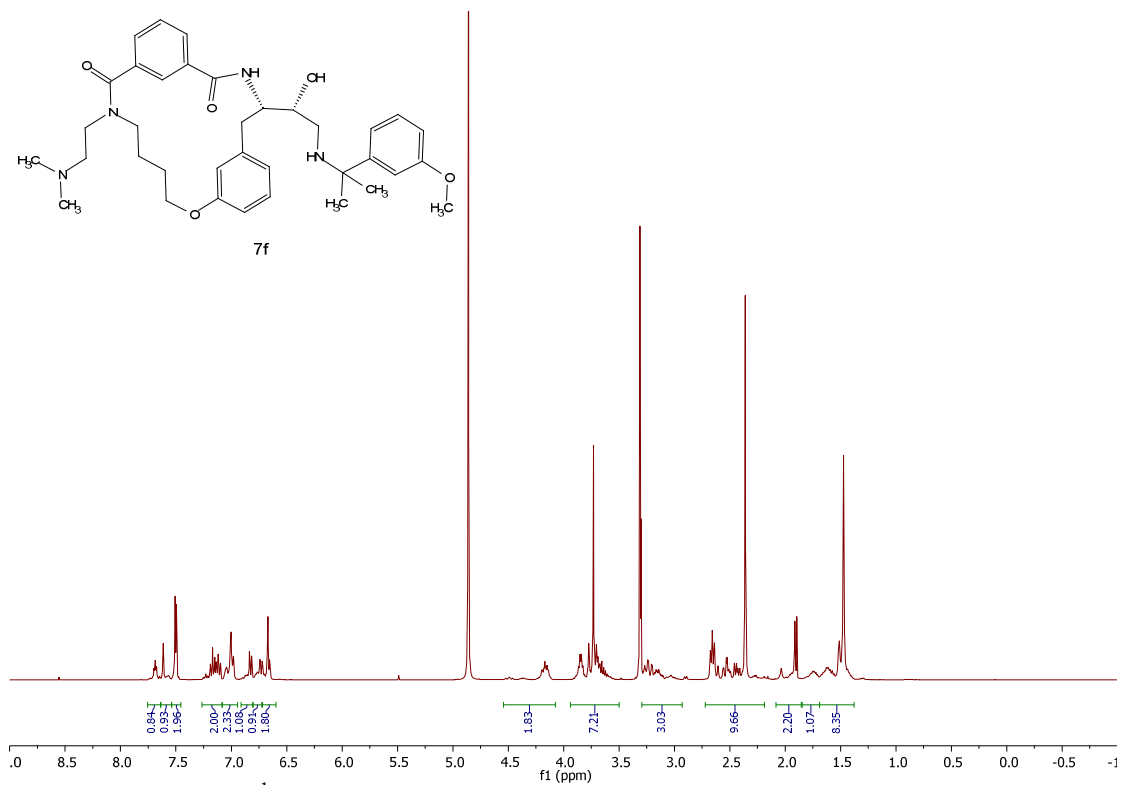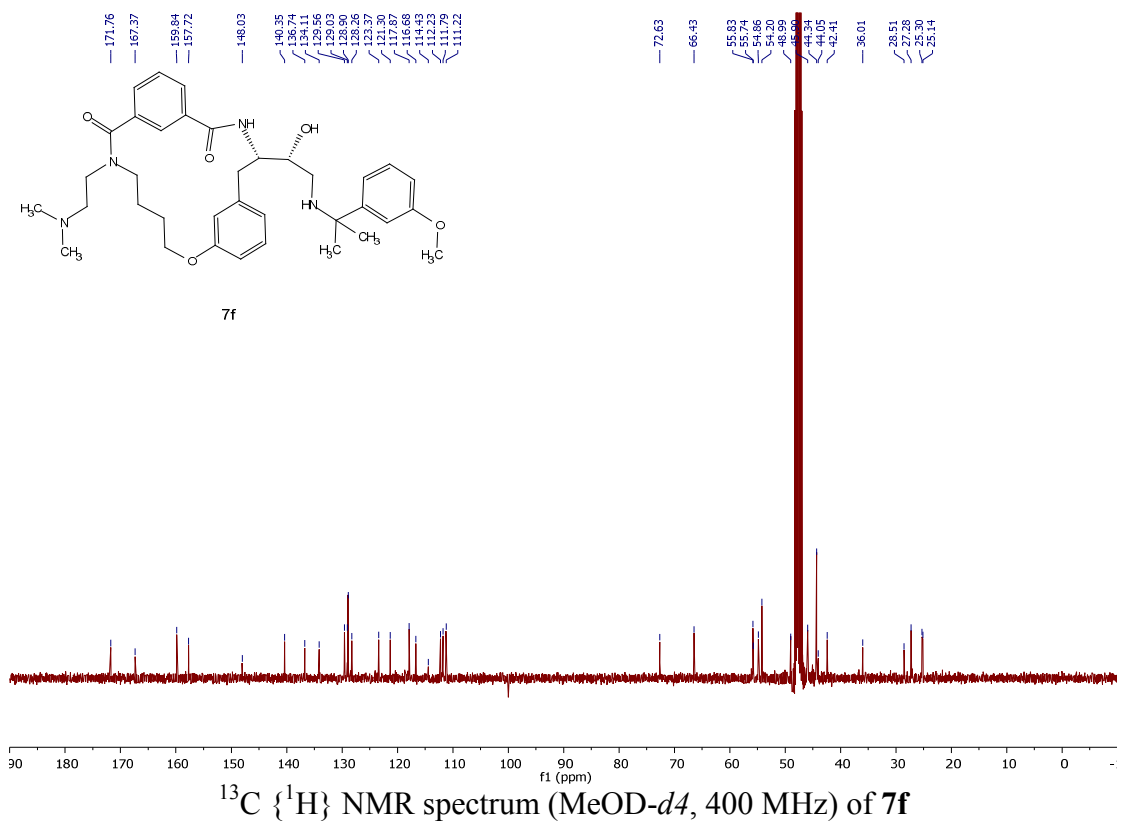



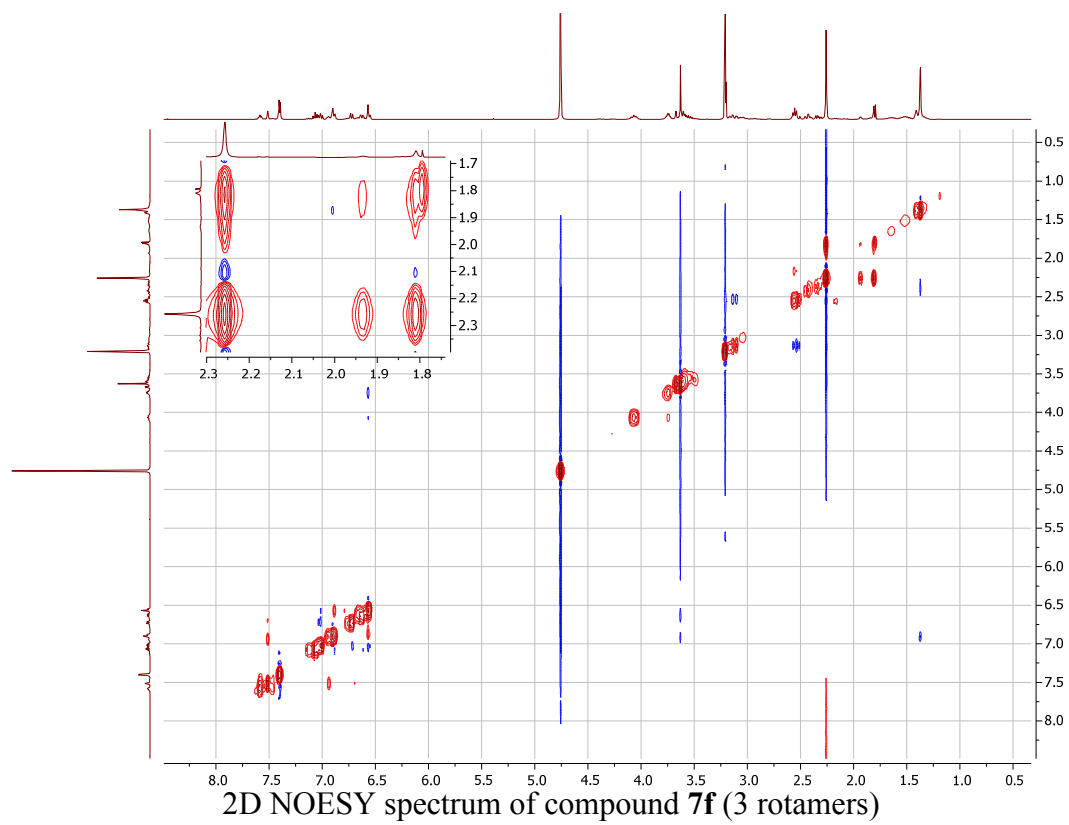

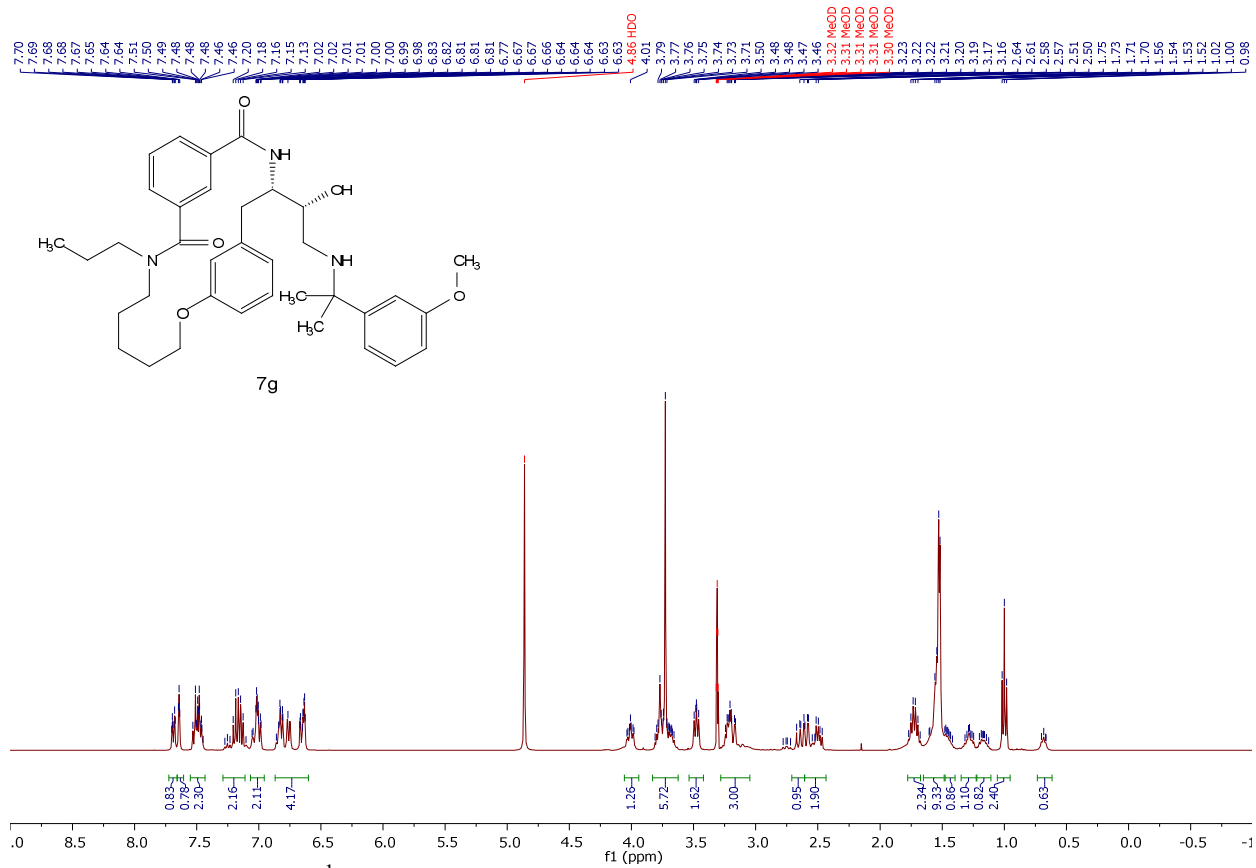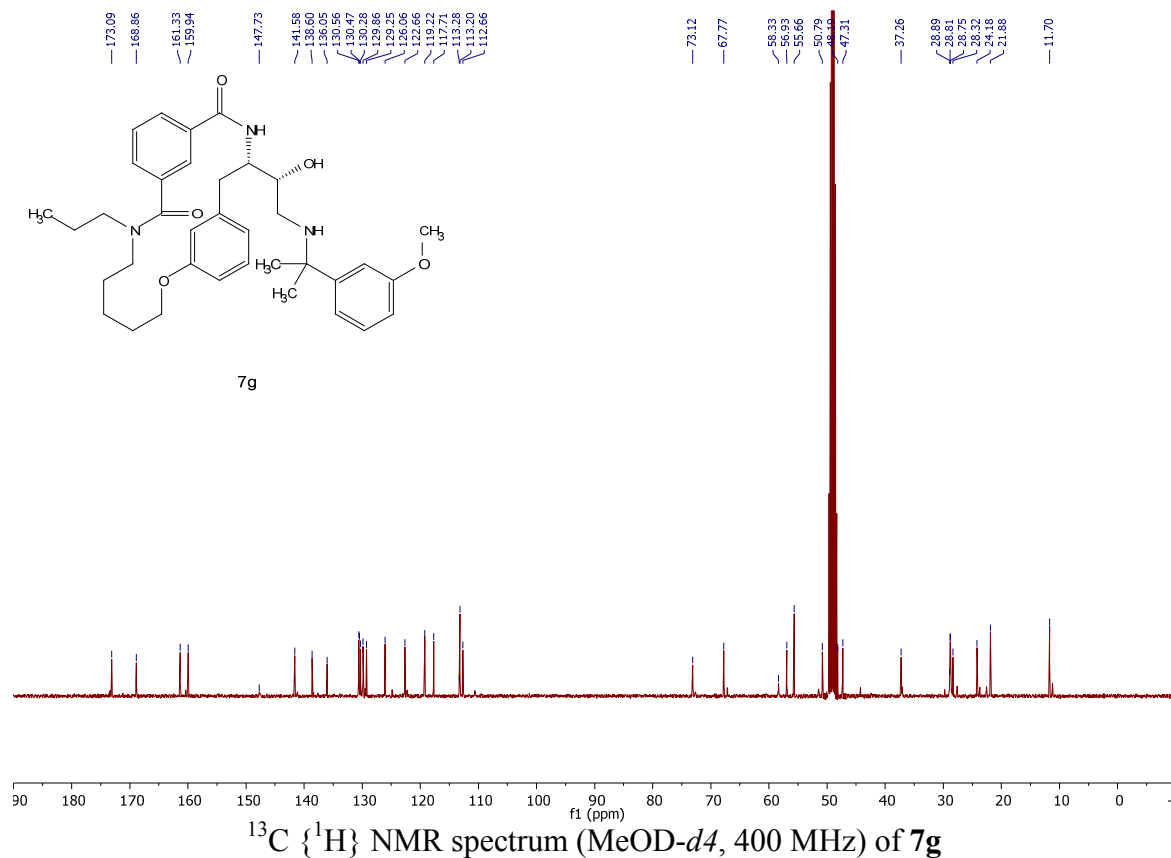

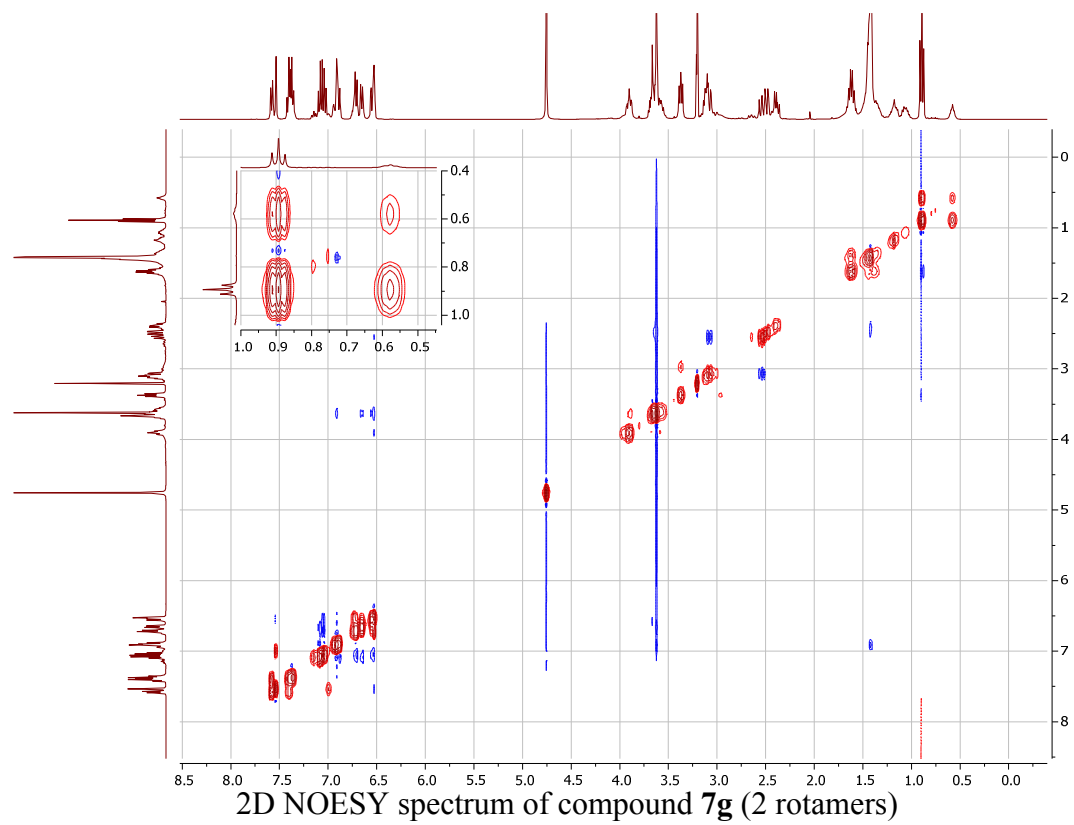

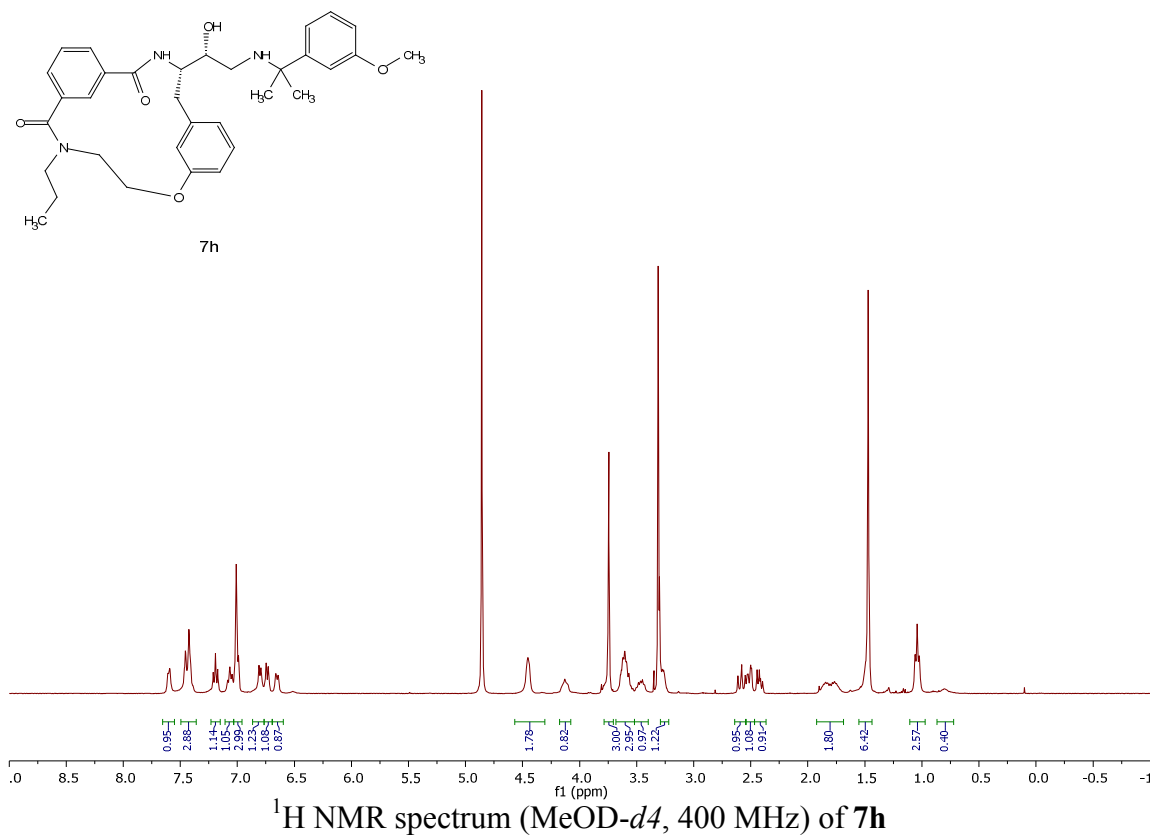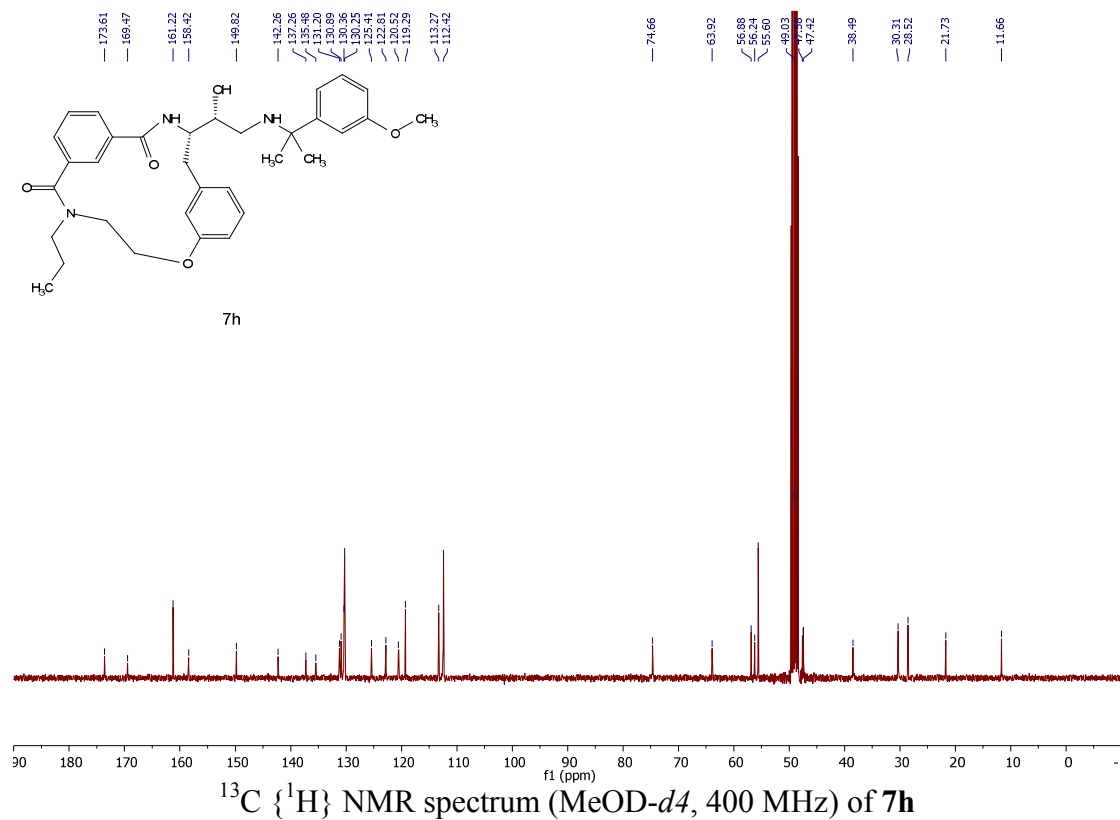

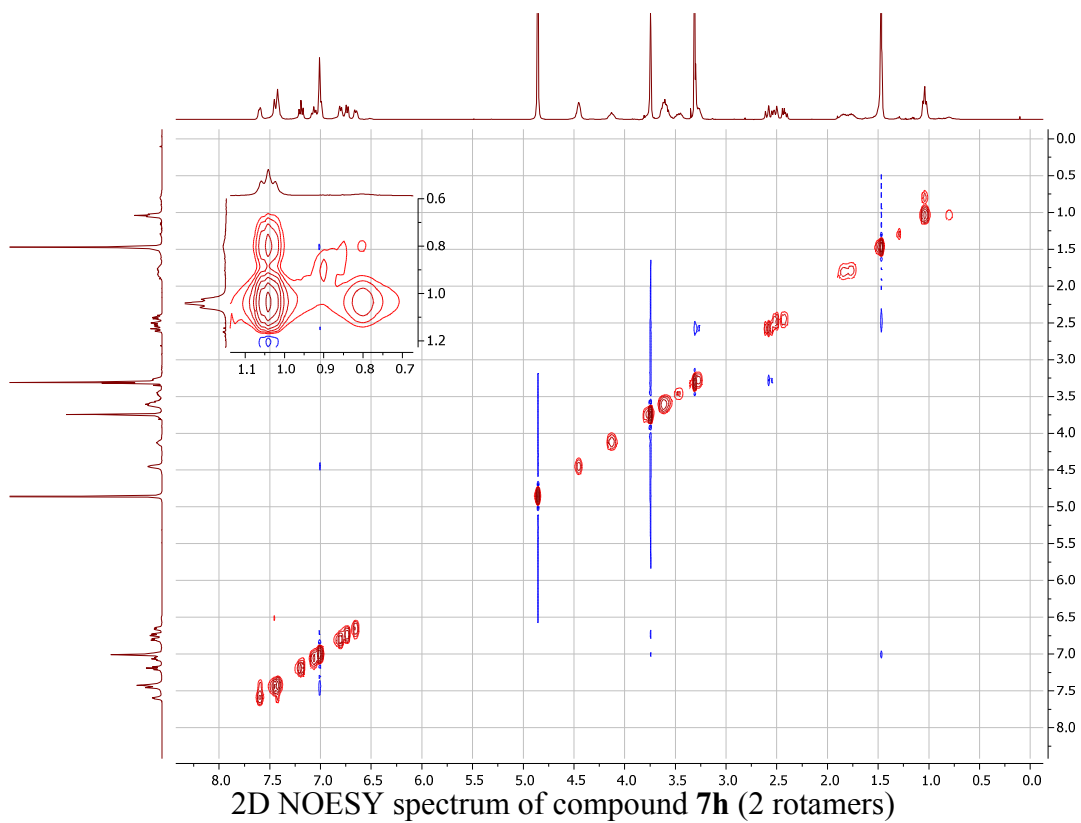

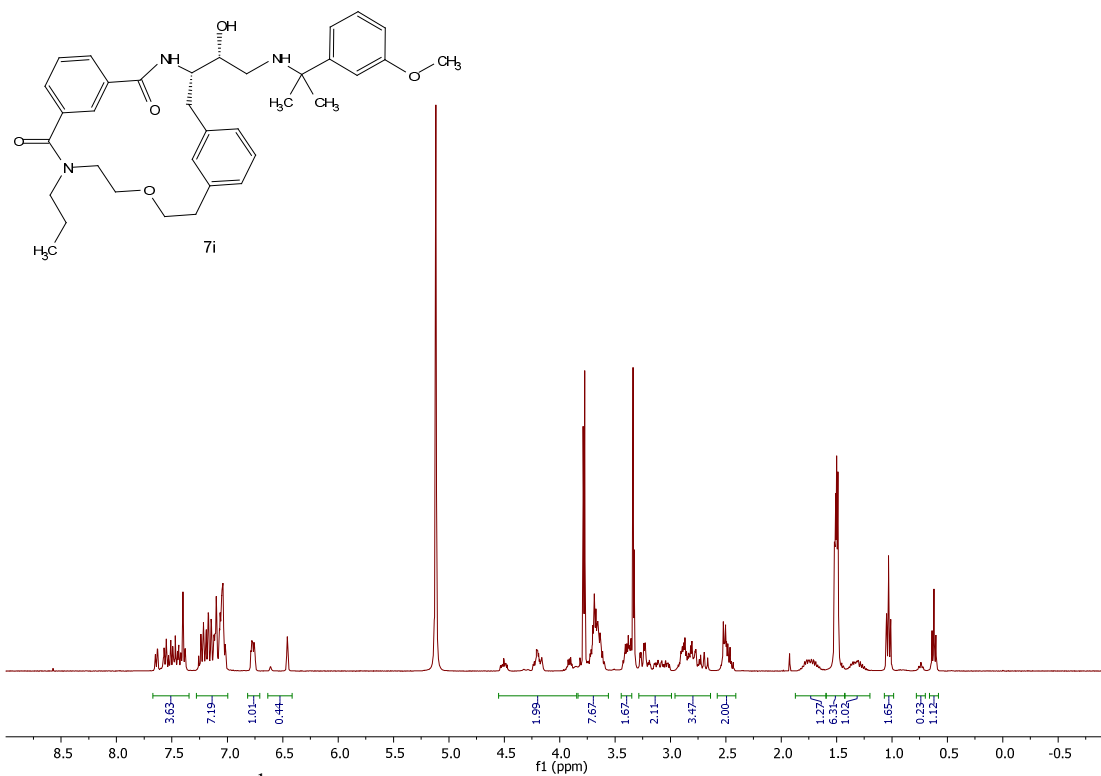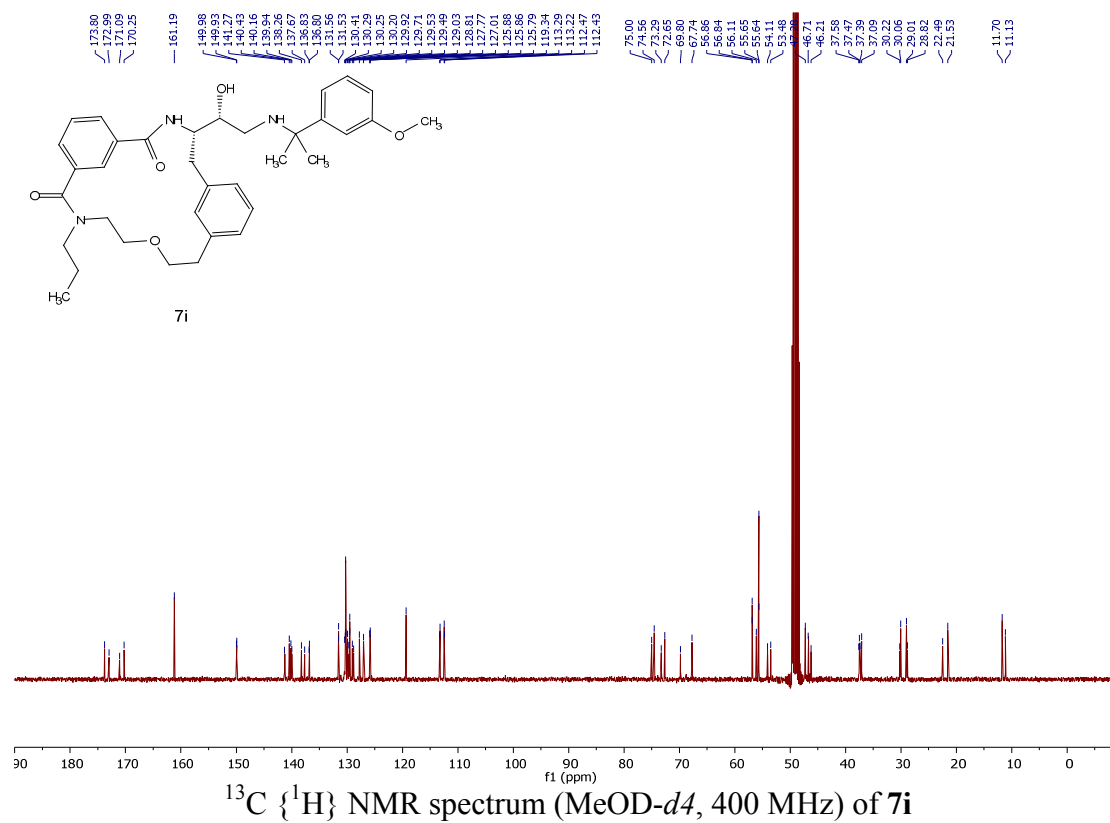

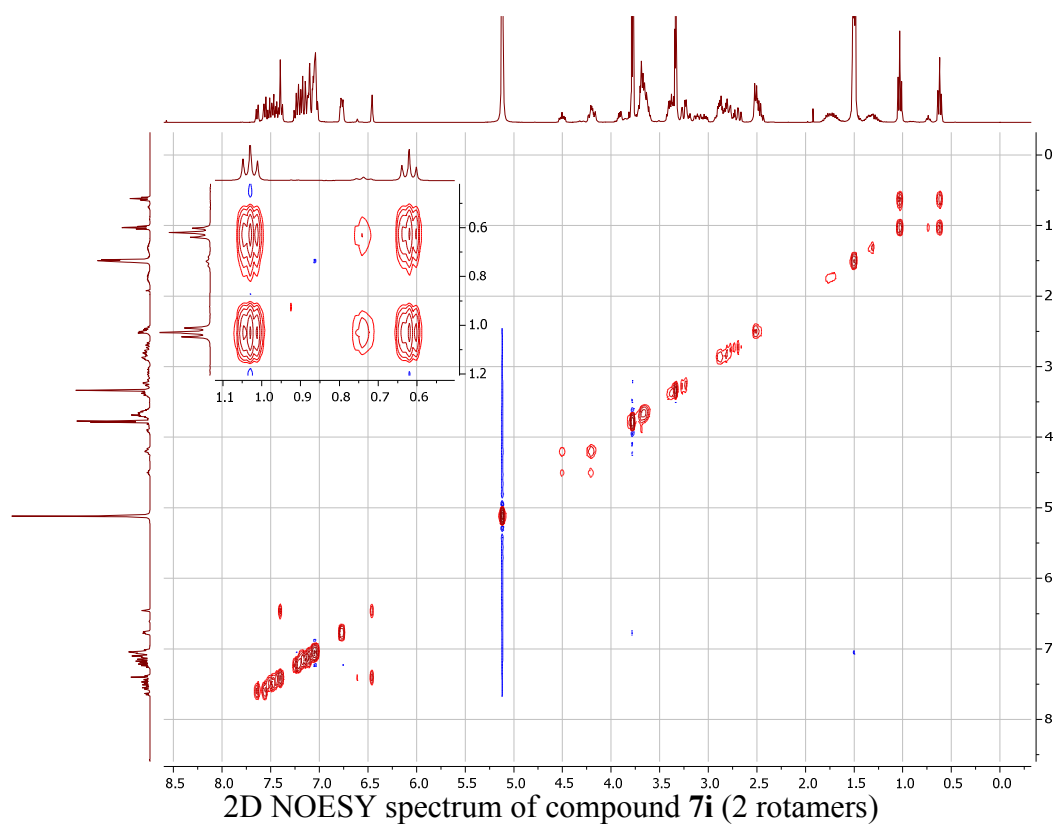

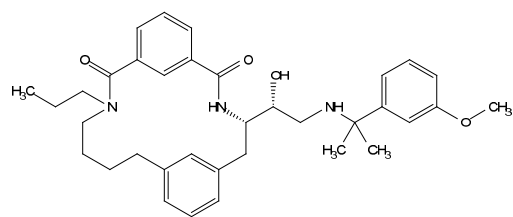

7j

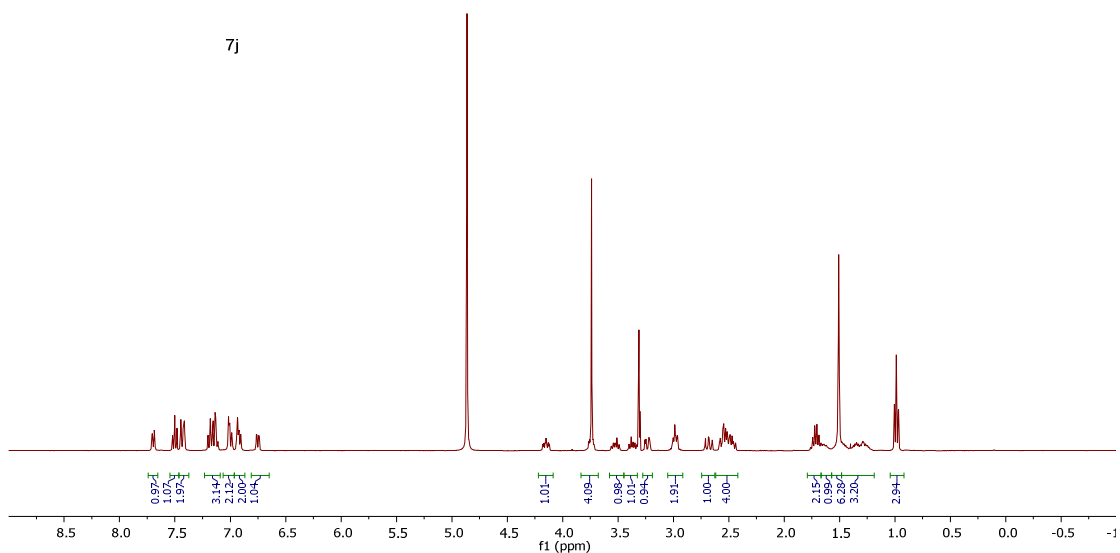

$^1\text{H}$  NMR spectrum (MeOD- $d_4$ , 400 MHz) of 7j

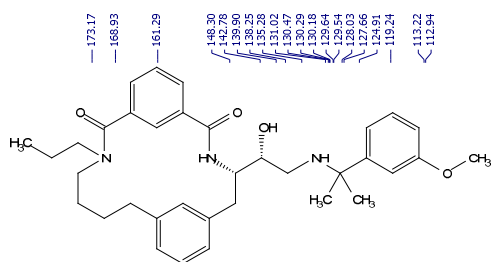

7j

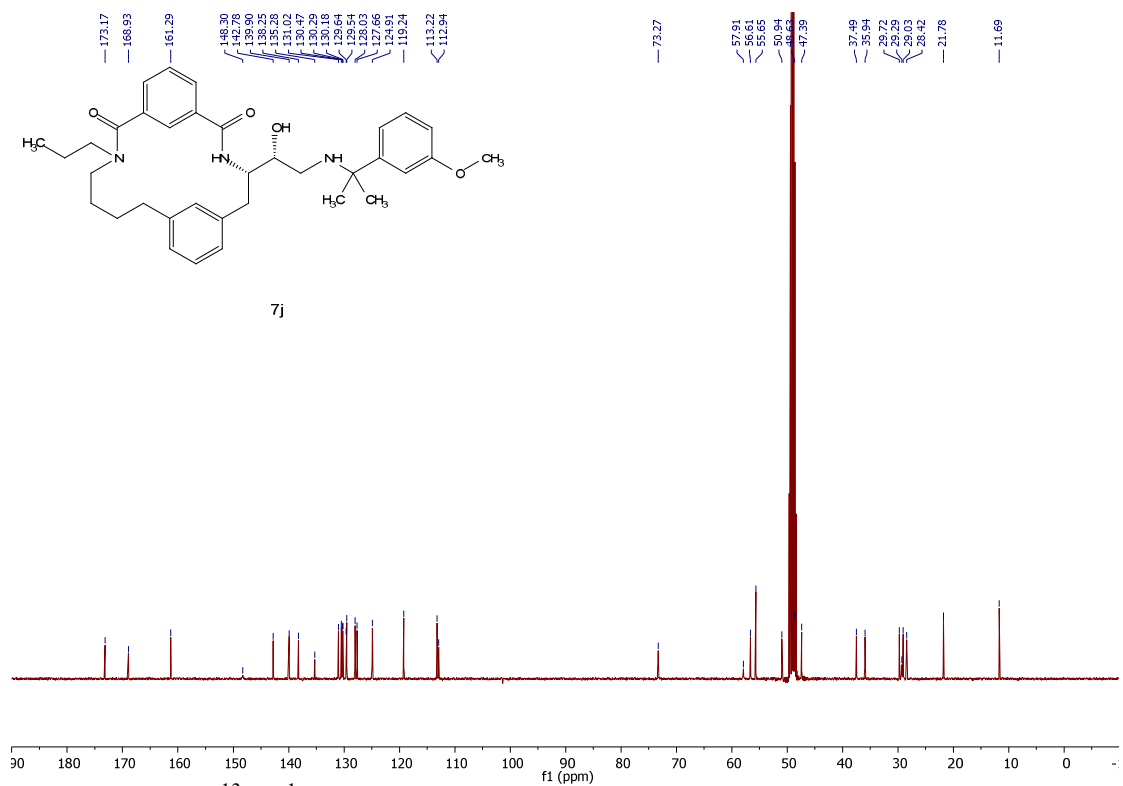

$^{13}\text{C}$   $\{^1\text{H}\}$  NMR spectrum (MeOD- $d_4$ , 400 MHz) of 7j



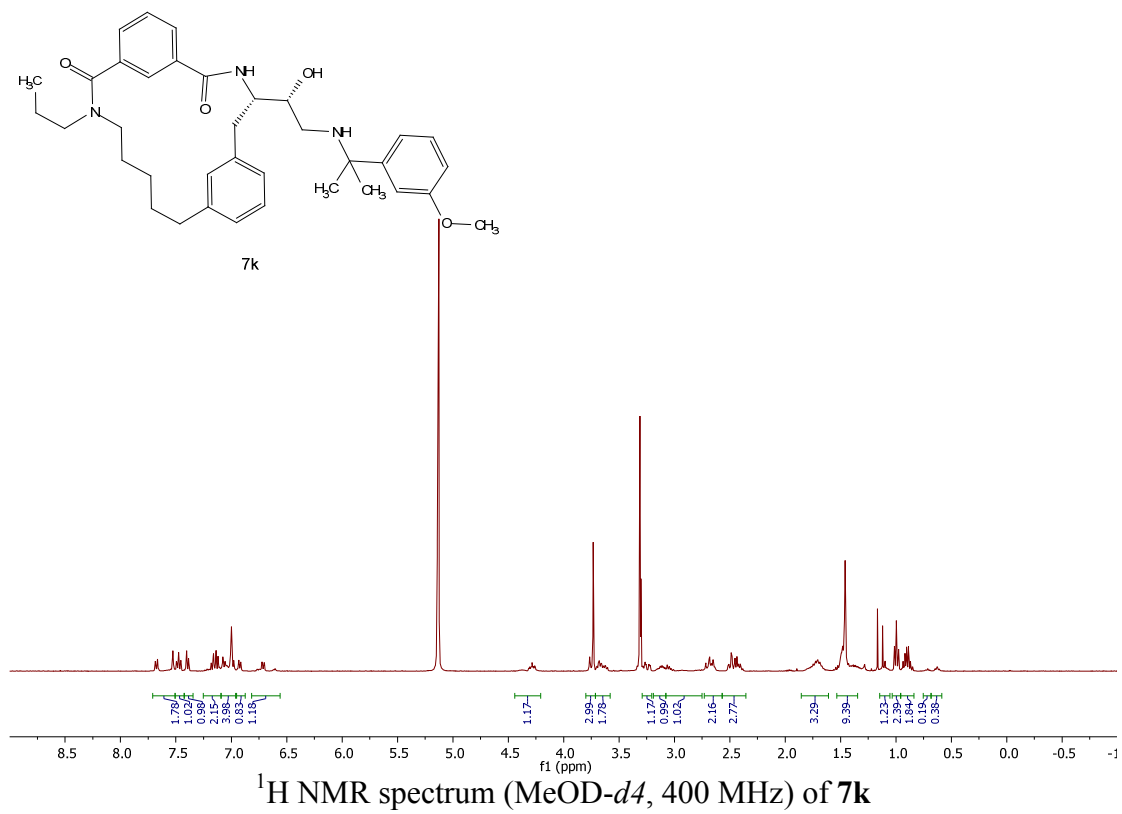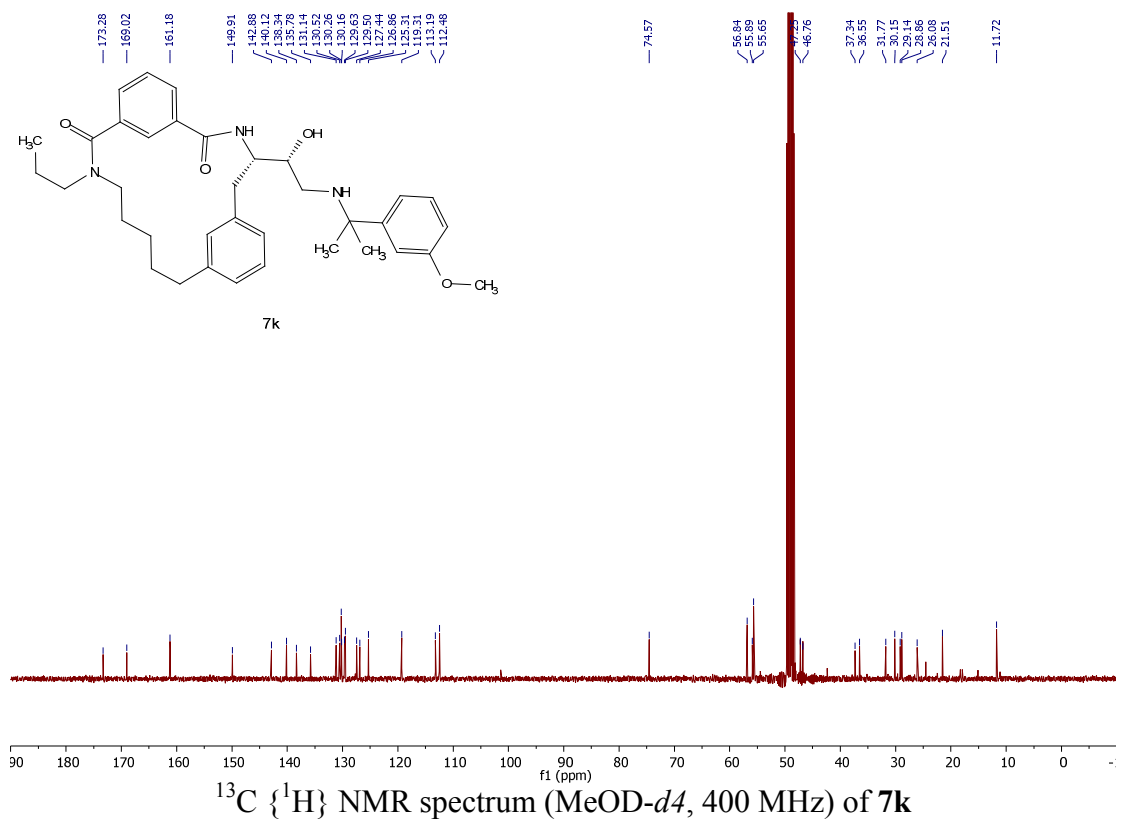

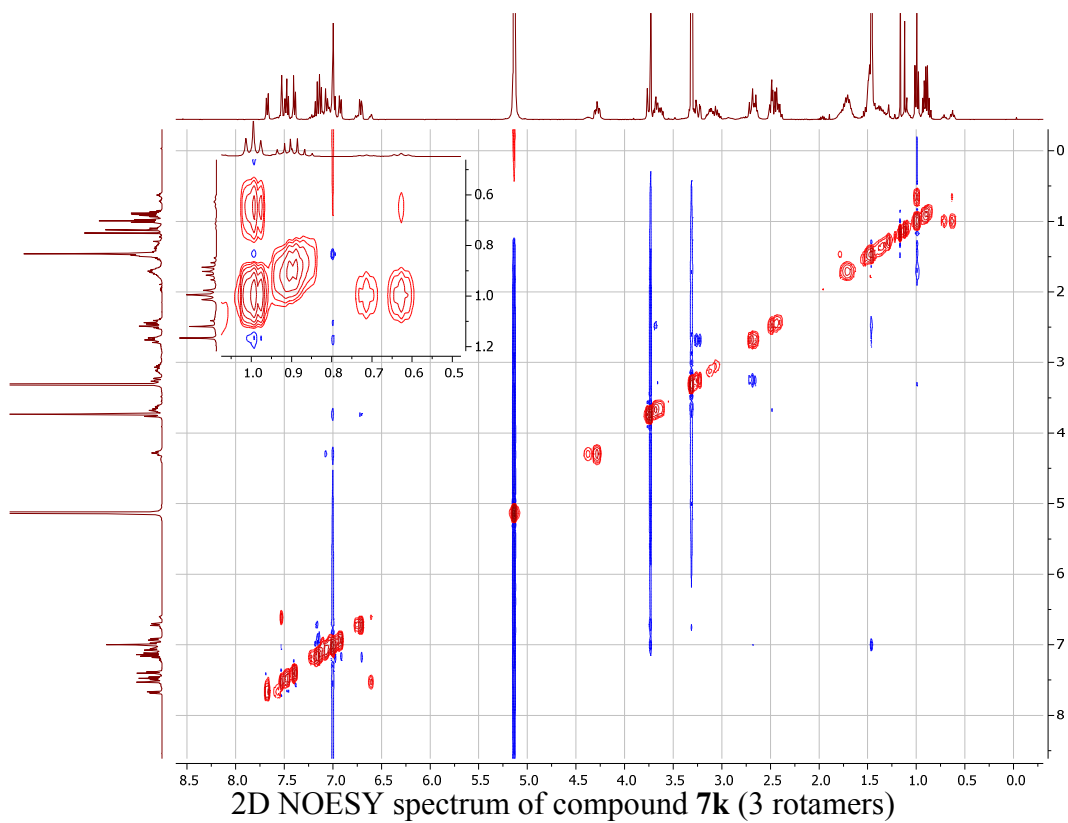

# HPLC analysis of final products 7a-k

| SAMPLE INFORMATION |                           |                     |                      |
|--------------------|---------------------------|---------------------|----------------------|
| Sample Name:       | 112-82-VAD-111            | Acquired By:        | System               |
| Sample Type:       | Unknown                   | Sample Set Name:    | 130223_serviss       |
| Vial:              | 16                        | Acq. Method Set:    | Serviss_Gr5%         |
| Injection #:       | 1                         | Processing Method:  | Gr_5 %               |
| Injection Volume:  | 10.00 ul                  | Channel Name:       | 2998 Ch1 254nm@4.8nm |
| Run Time:          | 25.0 Minutes              | Proc. Chnl. Descr.: | 2998 Ch1 254nm@4.8nm |
| Date Acquired:     | 13.02.2023 1:27:38 PM EET |                     |                      |
| Date Processed:    | 13.02.2023 2:37:10 PM EET |                     |                      |

Apollo C18-13 5um (4.6x150 mm)

15 min Gr. 5-95%ACN +0,1%H3PO4; 5 min lz. 95%ACN; 2 min Gr. 95-5% ACN; 3 min lz. 5% ACN.  
F=1mL/min. T=40oC.

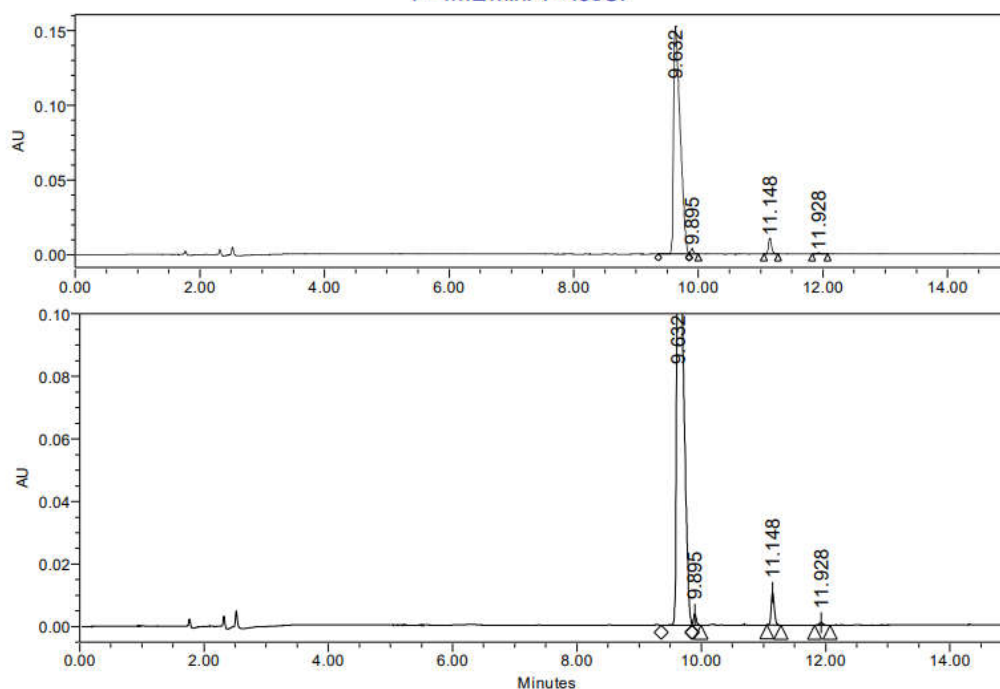

C=0.35mg/ml diluent (10%ACN+0,1%H3PO4)

|     | RT     | Area      | % Area | Height | EP Plate Count | Resolution | Selectivity | Width @ 50% |
|-----|--------|-----------|--------|--------|----------------|------------|-------------|-------------|
| 1   | 9.632  | 1100731   | 95.60  | 152252 | 38197          |            |             | 0.116       |
| 2   | 9.895  | 11467     | 1.00   | 3529   | 216655         | 1.87       | 1.03        | 0.050       |
| 3   | 11.148 | 36030     | 3.13   | 10409  | 240977         | 14.28      | 1.15        | 0.053       |
| 4   | 11.928 | 3186      | 0.28   | 748    | 167288         | 7.54       | 1.08        | 0.069       |
| Sum |        | 1151414.9 |        |        |                |            |             |             |

HPLC of 7a

**SAMPLE INFORMATION**

|                                            |                                          |
|--------------------------------------------|------------------------------------------|
| Sample Name: 110-80-VAd-581                | Acquired By: System                      |
| Sample Type: Unknown                       | Sample Set Name: 130223_serviss          |
| Vial: 14                                   | Acq. Method Set: Serviss_Gr5%            |
| Injection #: 1                             | Processing Method: Gr_5 %                |
| Injection Volume: 10.00 ul                 | Channel Name: 2998 Ch1 254nm@4.8nm       |
| Run Time: 25.0 Minutes                     | Proc. Chnl. Descr.: 2998 Ch1 254nm@4.8nm |
| Date Acquired: 13.02.2023 12:10:05 PM EET  |                                          |
| Date Processed: 13.02.2023 12:59:27 PM EET |                                          |

Apollo C18-13 5um (4.6x150 mm)  
 15 min Gr. 5-95%ACN +0,1%H3PO4; 5 min lz. 95%ACN; 2 min Gr. 95-5% ACN; 3 min lz. 5% ACN.  
 F=1mL/min. T=40oC.

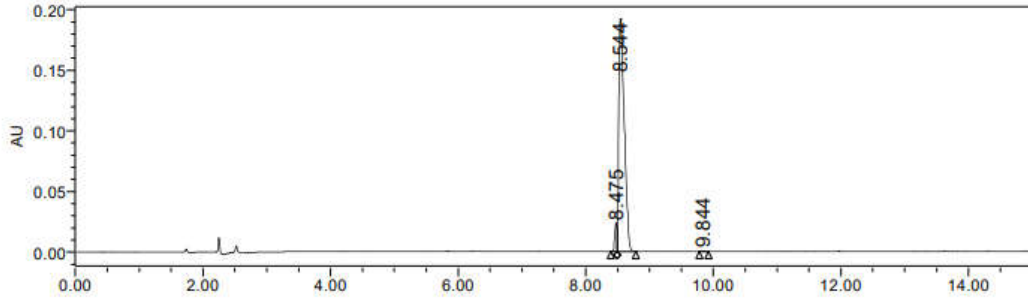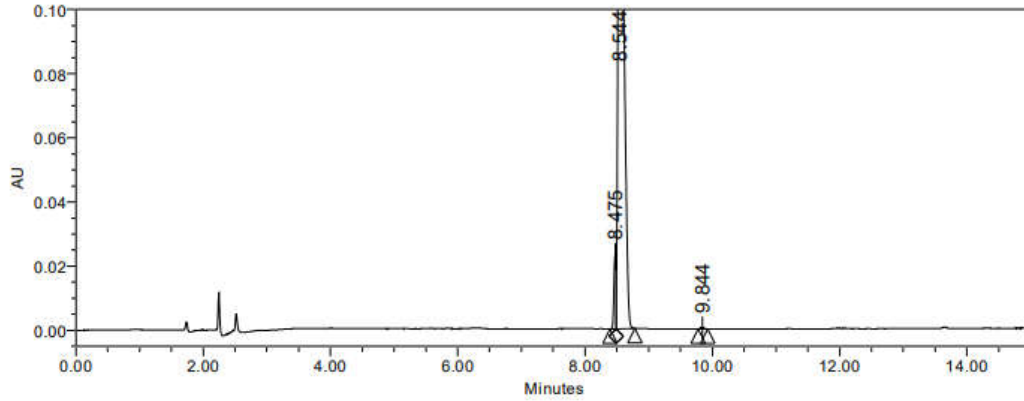

C=0.35mg/ml diluent (50%ACN+0,1%H3PO4)

|     | RT    | Area      | % Area | Height | EP Plate Count | Resolution | Selectivity | Width @ 50% |
|-----|-------|-----------|--------|--------|----------------|------------|-------------|-------------|
| 1   | 8.475 | 54785     | 4.50   | 23332  |                |            |             |             |
| 2   | 8.544 | 1160151   | 95.37  | 192122 | 42757          |            | 1.01        | 0.097       |
| 3   | 9.844 | 1562      | 0.13   | 440    | 169697         | 10.00      | 1.19        | 0.056       |
| Sum |       | 1216498.5 |        |        |                |            |             |             |

HPLC of **7b**

## SAMPLE INFORMATION

|                                            |                                          |
|--------------------------------------------|------------------------------------------|
| Sample Name: 167-88-VAD-577                | Acquired By: System                      |
| Sample Type: Unknown                       | Sample Set Name: 010323_serviss          |
| Vial: 18                                   | Acq. Method Set: Serviss_Gr5%            |
| Injection #: 1                             | Processing Method: Gr_5 %                |
| Injection Volume: 5.00 ul                  | Channel Name: 2998 Ch1 254nm@4.8nm       |
| Run Time: 25.0 Minutes                     | Proc. Chnl. Descr.: 2998 Ch1 254nm@4.8nm |
| Date Acquired: 01.03.2023 10:57:13 AM EET  |                                          |
| Date Processed: 01.03.2023 11:15:47 AM EET |                                          |

Apollo C18-13 5um (4.6x150 mm)  
 15min Gr 5-95%ACN + 0.1%H3PO4; 5min IZ 95%ACN; 2min Gr 95-5% ACN; 3min IZ 5%ACN.  
 F=1mL/min. T=40oC.

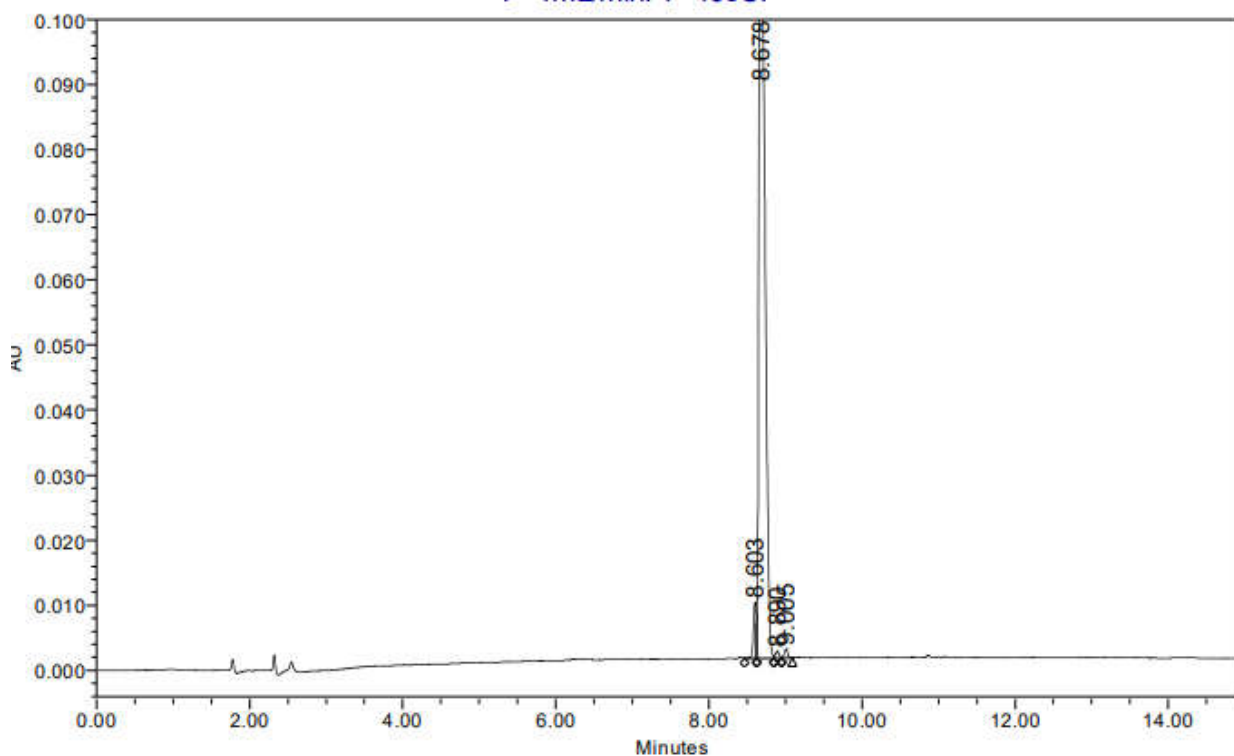

C=0,5mg/ml (25%ACN+0,1%H3PO4)

|     | RT    | Area     | % Area | Height | EP Plate Count | Resolution | Selectivity | Width @ 50% |
|-----|-------|----------|--------|--------|----------------|------------|-------------|-------------|
| 1   | 8.603 | 22633    | 3.13   | 8592   |                |            |             |             |
| 2   | 8.678 | 693263   | 95.81  | 134648 | 61452          |            | 1.01        | 0.082       |
| 3   | 8.890 | 3468     | 0.48   | 1006   | 147570         | 1.83       | 1.03        | 0.054       |
| 4   | 9.005 | 4212     | 0.58   | 1346   | 199927         | 1.33       | 1.02        | 0.047       |
| Sum |       | 723576.8 |        |        |                |            |             |             |

HPLC of 7c

## SAMPLE INFORMATION

|                                            |                |                     |                      |
|--------------------------------------------|----------------|---------------------|----------------------|
| Sample Name:                               | 117-87-MBO-120 | Acquired By:        | System               |
| Sample Type:                               | Unknown        | Sample Set Name:    | 140223_serviss       |
| Vial:                                      | 25             | Acq. Method Set:    | Serviss_Gr40%        |
| Injection #:                               | 1              | Processing Method:  | Gr_40%               |
| Injection Volume:                          | 10.00 ul       | Channel Name:       | 2998 Ch1 254nm@4.8nm |
| Run Time:                                  | 25.0 Minutes   | Proc. Chnl. Descr.: | 2998 Ch1 254nm@4.8nm |
| Date Acquired: 14.02.2023 9:48:30 AM EET   |                |                     |                      |
| Date Processed: 14.02.2023 11:23:19 AM EET |                |                     |                      |

Apollo C18-13 5um (4.6x150 mm)  
 15 min Gr. 40-95%ACN + 0.1%H3PO4; 5 min Iz. 95%ACN; 2 min Gr. 95-40% ACN; 3 min Iz. 40% ACN.  
 F=1mL/min. T=40oC.

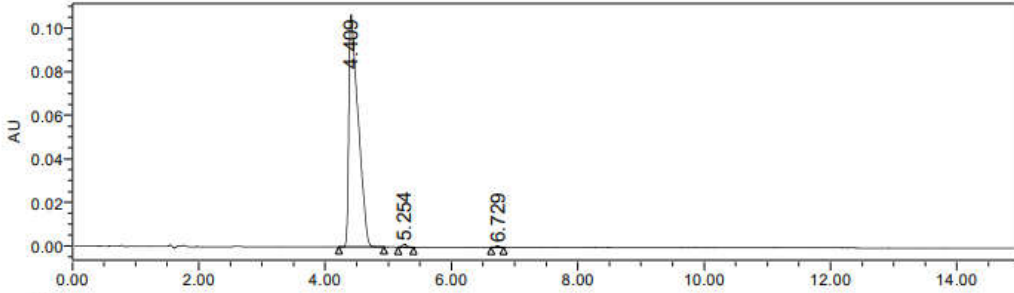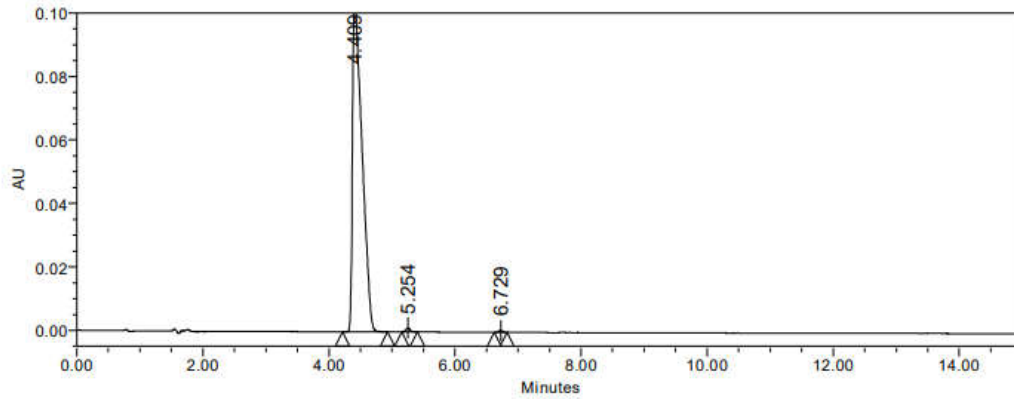

C=0,35mg/ml (50%ACN+0,1%H3PO4)

|     | RT    | Area      | % Area | Height | EP Plate Count | Resolution | Selectivity | Width @ 50% |
|-----|-------|-----------|--------|--------|----------------|------------|-------------|-------------|
| 1   | 4.409 | 1095146   | 99.27  | 106347 | 3962           |            |             | 0.165       |
| 2   | 5.254 | 5651      | 0.51   | 1260   | 31668          | 4.26       | 1.30        | 0.069       |
| 3   | 6.729 | 2449      | 0.22   | 591    | 59837          | 12.96      | 1.40        | 0.065       |
| Sum |       | 1103246.2 |        |        |                |            |             |             |

HPLC of **7d**

### SAMPLE INFORMATION

|                   |                            |                     |                      |
|-------------------|----------------------------|---------------------|----------------------|
| Sample Name:      | 108-78-VAD-193             | Acquired By:        | System               |
| Sample Type:      | Unknown                    | Sample Set Name:    | 130223_serviss       |
| Vial:             | 20                         | Acq. Method Set:    | Serviss_Gr40%        |
| Injection #:      | 1                          | Processing Method:  | Gr_40%               |
| Injection Volume: | 10.00 ul                   | Channel Name:       | 2998 Ch1 254nm@4.8nm |
| Run Time:         | 25.0 Minutes               | Proc. Chnl. Descr.: | 2998 Ch1 254nm@4.8nm |
| Date Acquired:    | 13.02.2023 5:00:26 PM EET  |                     |                      |
| Date Processed:   | 14.02.2023 10:25:32 AM EET |                     |                      |

Apollo C18-13 5um (4.6x150 mm)  
 15min Gr 40-95%ACN + 0.1%H3PO4; 5min IZ 95%ACN; 2min Gr 95-40% ACN; 3min IZ 40%ACN.  
 F=1mL/min. T=40oC.

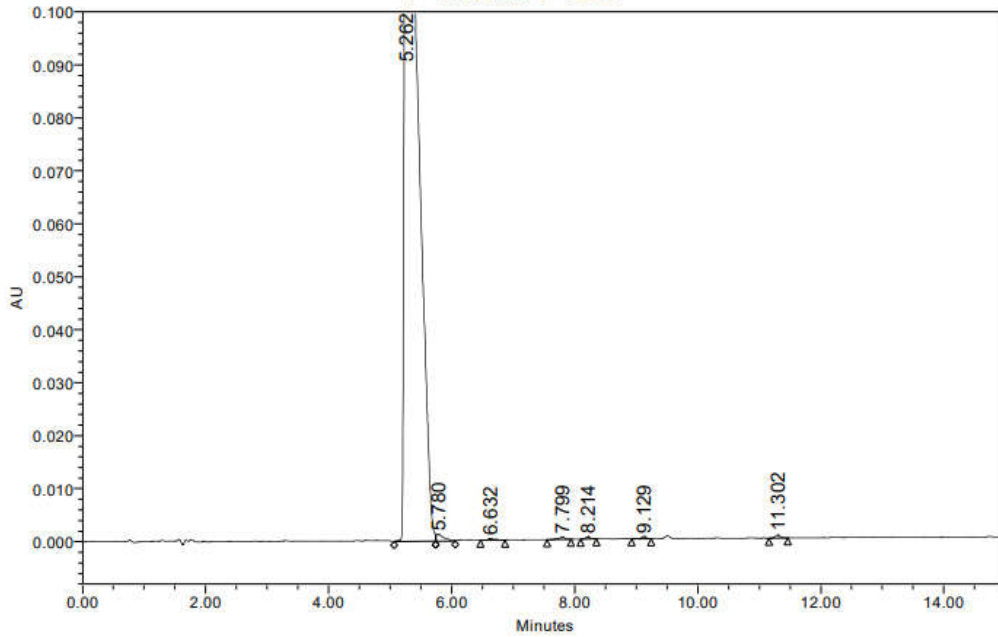

C=0.5mg/m (40%ACN+0.1%H3PO4)

|     | RT     | Area      | % Area | Height | EP Plate Count | Resolution | Selectivity | Width @ 50% |
|-----|--------|-----------|--------|--------|----------------|------------|-------------|-------------|
| 1   | 5.262  | 2319643   | 98.90  | 161191 | 2833           |            |             | 0.233       |
| 2   | 5.780  | 11962     | 0.51   | 1298   |                |            | 1.14        |             |
| 3   | 6.632  | 2513      | 0.11   | 311    | 10069          |            | 1.20        | 0.156       |
| 4   | 7.799  | 3649      | 0.16   | 527    | 43654          | 5.65       | 1.23        | 0.088       |
| 5   | 8.214  | 2371      | 0.10   | 462    | 57209          | 2.90       | 1.07        | 0.081       |
| 6   | 9.129  | 2239      | 0.10   | 419    | 74898          | 6.78       | 1.14        | 0.079       |
| 7   | 11.302 | 3174      | 0.14   | 585    | 106236         | 16.02      | 1.29        | 0.082       |
| Sum |        | 2345549.9 |        |        |                |            |             |             |

HPLC of 7e

### SAMPLE INFORMATION

|                   |                          |                     |                     |
|-------------------|--------------------------|---------------------|---------------------|
| Sample Name:      | 109-79-VAD-614           | Sample Set Name:    | 09022023_Serivis    |
| Sample Type:      | Unknown                  | Acq. Method Set:    | Serivis G5%_Iz_UV   |
| Vial:             | 5                        | Processing Method:  | G 5%                |
| Injection#:       | 1                        | Channel Name:       | 2998 Ch1 254nm@1.2m |
| Injection Volume: | 10.00ul                  | Proc. Chnl. Descr.: | 2998 Ch1 254nm@1.2m |
| Run Time:         | 25.0 Minutes             |                     |                     |
| Date Acquired:    | 2/13/2023 12:42:45 PMEET | Acquired By:        | System              |
| Date Processed:   | 2/13/2023 1:56:46 PMEET  |                     |                     |

Adamas C18-2 (4,6x150 mm)

15 min G: 5-95%ACN+0.1%t-BPO4; 5 min Iz 95%ACN 3 min G: 95-5%ACN 2 min Iz 5%ACN F = 1ml/min; 40oC

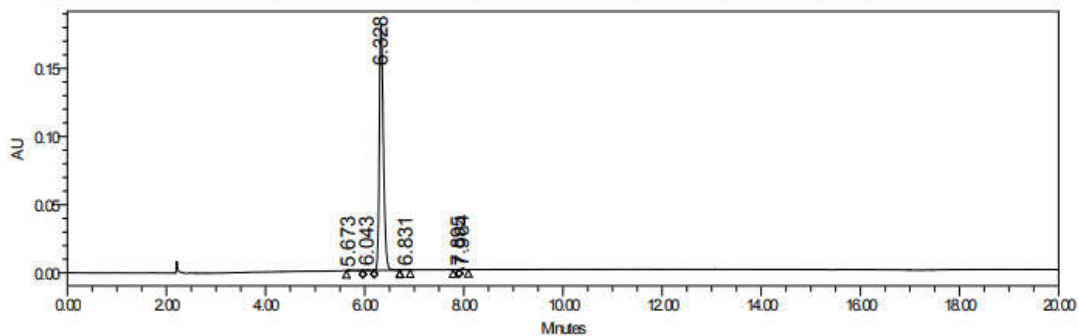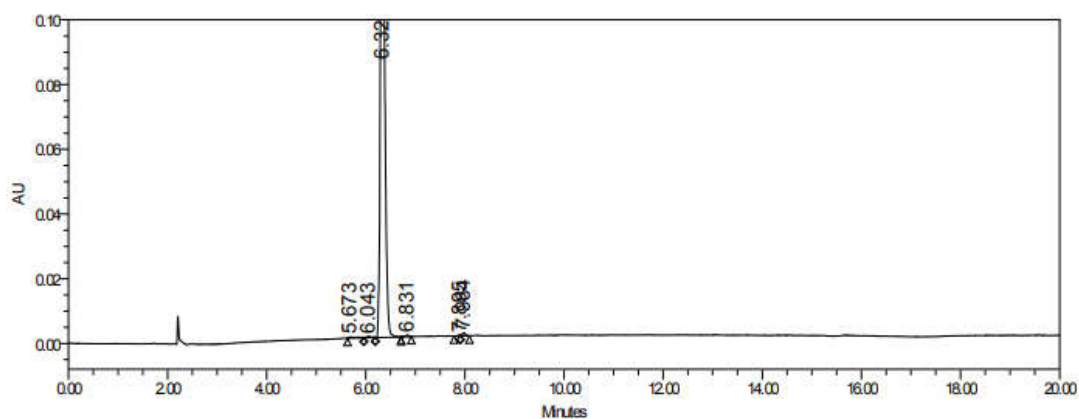

C=0.3mg/ml (50%ACN/0.1%t-BPO4)

|     | RT    | Area      | %Area | Height | EP Plate Count | Width @50% | Resolution | Selectivity |
|-----|-------|-----------|-------|--------|----------------|------------|------------|-------------|
| 1   | 5.673 | 4172      | 0.40  | 336    | 27612          | 0.0804     |            |             |
| 2   | 6.043 | 3181      | 0.30  | 389    | 5132           | 0.1986     | 1.567      | 1.088       |
| 3   | 6.328 | 1031952   | 98.53 | 180789 | 29801          | 0.0863     | 1.178      | 1.062       |
| 4   | 6.831 | 2696      | 0.26  | 460    | 32064          | 0.0898     | 3.372      | 1.103       |
| 5   | 7.895 | 833       | 0.08  | 245    |                |            |            | 1.198       |
| 6   | 7.964 | 4542      | 0.43  | 936    | 70035          | 0.0708     |            | 1.011       |
| Sum |       | 1047376.6 |       |        |                |            |            |             |

HPLC of 7f



**SAMPLE INFORMATION**

|                                          |                |                     |                     |
|------------------------------------------|----------------|---------------------|---------------------|
| Sample Name:                             | 115-85-VAD-180 | Sample Set Name:    | 14022023_Serviss    |
| Sample Type:                             | Unknown        | Acq. Method Set:    | Serviss G5%_iz_LV   |
| Vial:                                    | 12             | Processing Method:  | G 5%                |
| Injection#:                              | 1              | Channel Name:       | 2998 Ch1 254nm@1.2m |
| Injection Volume:                        | 10.00 µl       | Proc. Chnl. Descr.: | 2998 Ch1 254nm@1.2m |
| Run Time:                                | 25.0 Minutes   |                     |                     |
| Date Acquired: 2/14/2023 10:04:27 AMEET  |                | Acquired By: System |                     |
| Date Processed: 2/14/2023 10:27:41 AMEET |                |                     |                     |

Adamas C18-2 (4.6x150 mm)

15 min G: 5-95%ACN+0.1%*t*-BPO<sub>4</sub>; 5 min I: 95%ACN; 3 min G: 95-5%ACN; 2 min I: 5%ACN; F = 1mL/min; 40°C

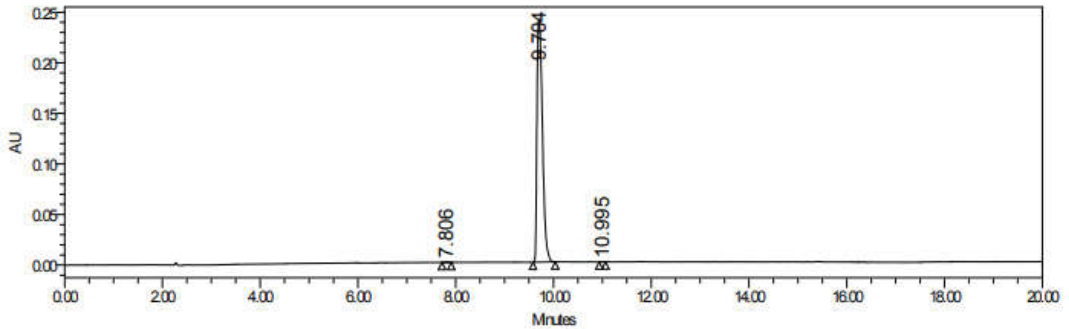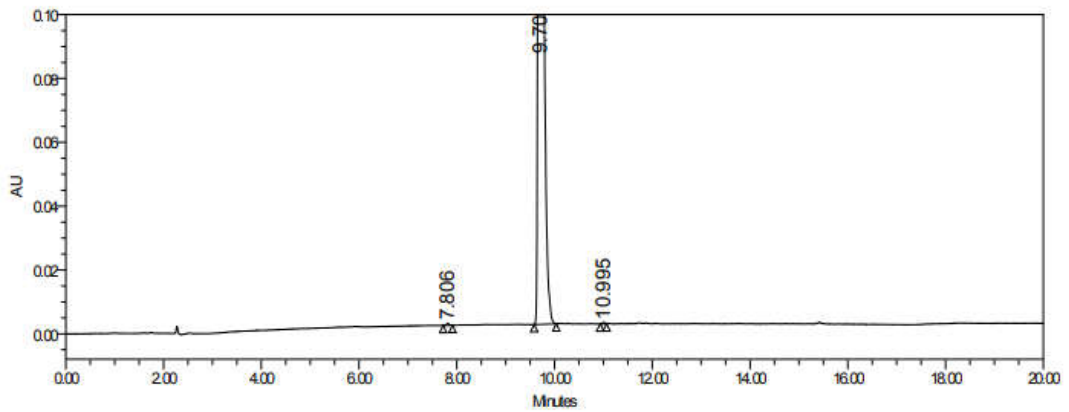

C=0.55 mg/ml (10%ACN 0.1%*t*-BPO<sub>4</sub>)

|     | RT     | Area      | %Area | Height | EP Plate Count | Width@50% | Resolution | Selectivity |
|-----|--------|-----------|-------|--------|----------------|-----------|------------|-------------|
| 1   | 7.806  | 2199      | 0.12  | 510    | 90330          | 0.0611    |            |             |
| 2   | 9.704  | 1877422   | 99.81 | 239946 | 33896          | 0.1241    | 12.094     | 1.299       |
| 3   | 10.995 | 1285      | 0.07  | 357    | 238831         | 0.0530    | 8.611      | 1.157       |
| Sum |        | 1880906.2 |       |        |                |           |            |             |

HPLC of 7g

## SAMPLE INFORMATION

|                   |                            |                     |                      |
|-------------------|----------------------------|---------------------|----------------------|
| Sample Name:      | 158-83-VAD-114             | Acquired By:        | System               |
| Sample Type:      | Unknown                    | Sample Set Name:    | 280223_serviss       |
| Vial:             | 16                         | Acq. Method Set:    | Serviss_Gr5%         |
| Injection #:      | 1                          | Processing Method:  | Gr_5 %_254           |
| Injection Volume: | 10.00 ul                   | Channel Name:       | 2998 Ch1 254nm@4.8nm |
| Run Time:         | 25.0 Minutes               | Proc. Chnl. Descr.: | 2998 Ch1 254nm@4.8nm |
| Date Acquired:    | 28.02.2023 9:50:43 AM EET  |                     |                      |
| Date Processed:   | 28.02.2023 10:15:32 AM EET |                     |                      |

Apollo C18-13 5um (4.6x150 mm)  
 15 min Gr. 5-95%ACN +0,1%H3PO4; 5 min lz. 95%ACN; 2 min Gr. 95-5% ACN; 3 min lz. 5% ACN.  
 F=1mL/min. T=40oC.

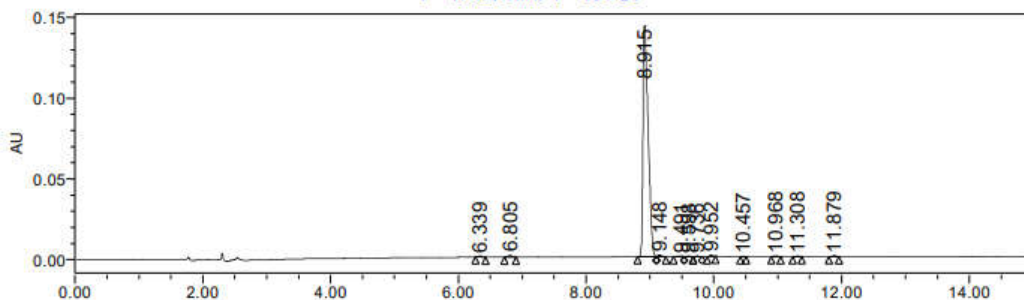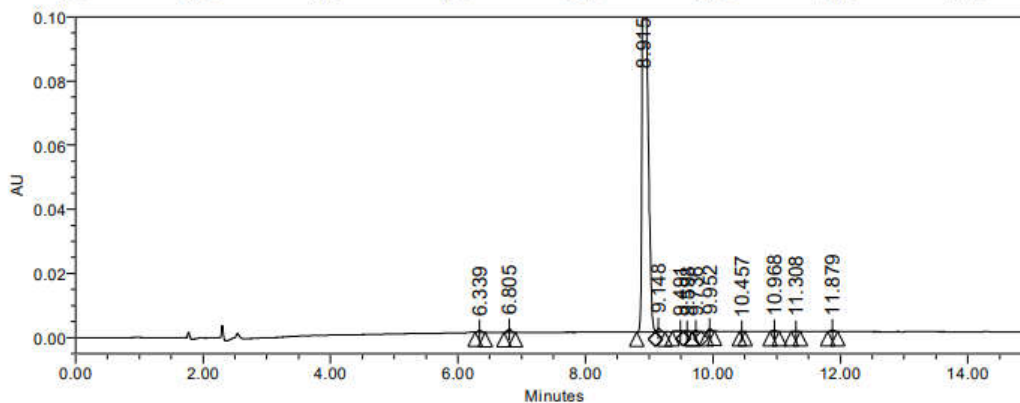

C=0,35mg/ml( 20%ACN+0,1%H3PO4)

|     | RT     | Area     | % Area | Height | EP Plate Count | Resolution | Selectivity | Width @ 50% |
|-----|--------|----------|--------|--------|----------------|------------|-------------|-------------|
| 1   | 6.339  | 2287     | 0.27   | 601    | 62627          |            |             | 0.060       |
| 2   | 6.805  | 4069     | 0.49   | 1001   | 63712          | 4.48       | 1.10        | 0.063       |
| 3   | 8.915  | 817596   | 97.57  | 143107 | 52645          | 16.07      | 1.40        | 0.091       |
| 4   | 9.148  | 4086     | 0.49   | 1074   | 132721         | 1.83       | 1.03        | 0.059       |
| 5   | 9.491  | 1501     | 0.18   | 258    | 37811          | 2.32       | 1.05        | 0.115       |
| 6   | 9.598  | 985      | 0.12   | 194    | 66541          | 0.62       | 1.01        | 0.088       |
| 7   | 9.736  | 952      | 0.11   | 306    | 250547         | 1.22       | 1.02        | 0.046       |
| 8   | 9.952  | 2102     | 0.25   | 723    | 267010         | 2.80       | 1.03        | 0.045       |
| 9   | 10.457 | 297      | 0.04   | 98     | 243316         | 6.26       | 1.06        | 0.050       |
| 10  | 10.968 | 1557     | 0.19   | 449    | 223034         | 5.76       | 1.06        | 0.055       |
| 11  | 11.308 | 606      | 0.07   | 190    | 281665         | 3.83       | 1.04        | 0.050       |
| 12  | 11.879 | 1926     | 0.23   | 519    | 236193         | 6.25       | 1.06        | 0.058       |
| Sum |        | 837965.0 |        |        |                |            |             |             |

HPLC of 7h

### SAMPLE INFORMATION

|                   |                          |                     |                      |
|-------------------|--------------------------|---------------------|----------------------|
| Sample Name:      | 111-81-VAD-610           | Sample Set Name:    | 09022023_Serviss     |
| Sample Type:      | Unknown                  | Acq. Method Set:    | Serviss G5%_Iz_LV    |
| Vial:             | 7                        | Processing Method:  | G 5%                 |
| Injection#:       | 1                        | Channel Name:       | 2998 Ch1 254mm@1.2mm |
| Injection Volume: | 10.00 µl                 | Proc. Chnl. Descr.: | 2998 Ch1 254mm@1.2mm |
| Run Time:         | 25.0 Minutes             |                     |                      |
| Date Acquired:    | 2/13/2023 2:27:41 PM EET | Acquired By:        | System               |
| Date Processed:   | 2/13/2023 3:47:09 PM EET |                     |                      |

Adamas C18-2 (4,6x150 mm)

15 min Gr. 5-95% ACN+0.1% H<sub>3</sub>PO<sub>4</sub>; 5 min Iz 95% ACN 3 min Gr. 95-5% ACN 2 min Iz 5% ACN F = 1mL/min, 40°C

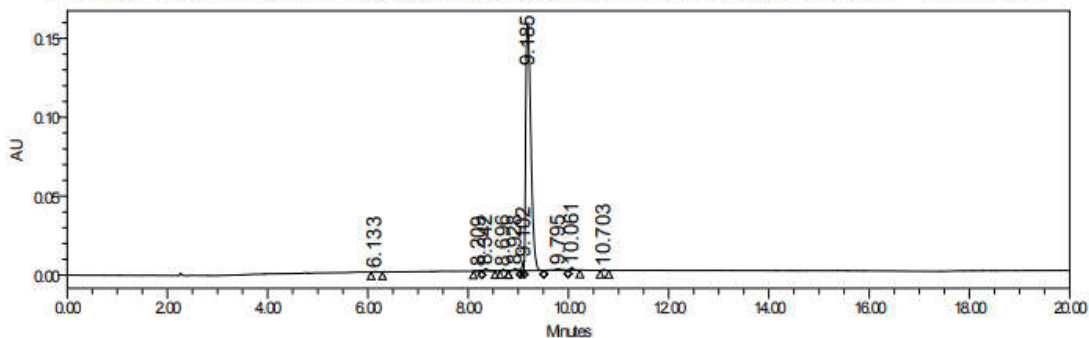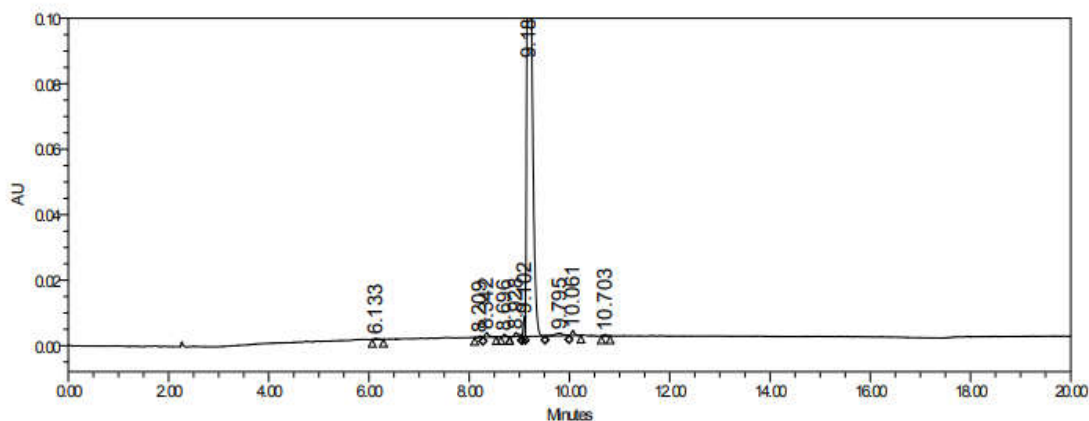

C=0.45 mg/ml (10% ACN 0.1% H<sub>3</sub>PO<sub>4</sub>)

|     | RT     | Area      | %Area | Height | EP Plate Count | Width @50% | Resolution | Selectivity |
|-----|--------|-----------|-------|--------|----------------|------------|------------|-------------|
| 1   | 6.133  | 1695      | 0.15  | 317    | 36551          | 0.0755     |            |             |
| 2   | 8.209  | 1595      | 0.14  | 413    | 122982         | 0.0551     | 18.762     | 1.443       |
| 3   | 8.342  | 6850      | 0.59  | 1307   | 83057          | 0.0681     | 1.275      | 1.020       |
| 4   | 8.696  | 2702      | 0.23  | 708    | 123944         | 0.0581     | 3.308      | 1.051       |
| 5   | 8.928  | 6964      | 0.60  | 1120   | 94381          | 0.0684     | 2.156      | 1.032       |
| 6   | 9.102  | 14241     | 1.23  | 6036   |                |            |            | 1.023       |
| 7   | 9.185  | 1106586   | 95.40 | 156667 | 37597          | 0.1115     |            | 1.011       |
| 8   | 9.795  | 10352     | 0.89  | 821    | 21233          | 0.1582     | 2.667      | 1.079       |
| 9   | 10.061 | 6787      | 0.59  | 1453   | 143525         | 0.0625     | 1.422      | 1.032       |
| 10  | 10.703 | 2223      | 0.19  | 447    | 123172         | 0.0718     | 5.638      | 1.075       |
| Sum |        | 1159995.5 |       |        |                |            |            |             |

HPLC of 7i

## SAMPLE INFORMATION

|                             |                                          |
|-----------------------------|------------------------------------------|
| Sample Name: 116-86-VAD-245 | Acquired By: System                      |
| Sample Type: Unknown        | Sample Set Name: 140223_serviss          |
| Vial: 29                    | Acq. Method Set: Serviss_Gr40%           |
| Injection #: 1              | Processing Method: Gr_40%                |
| Injection Volume: 10.00 ul  | Channel Name: 2998 Ch1 254nm@4.8nm       |
| Run Time: 25.0 Minutes      | Proc. Chnl. Descr.: 2998 Ch1 254nm@4.8nm |

Date Acquired: 14.02.2023 1:05:42 PM EET  
Date Processed: 14.02.2023 2:15:09 PM EET

Apollo C18-13 5um (4.6x150 mm)  
15 min Gr. 40-95%ACN + 0.1%H3PO4; 5 min lz. 95%ACN; 2 min Gr. 95-40% ACN; 3 min lz. 40% ACN.  
F=1mL/min. T=40oC.

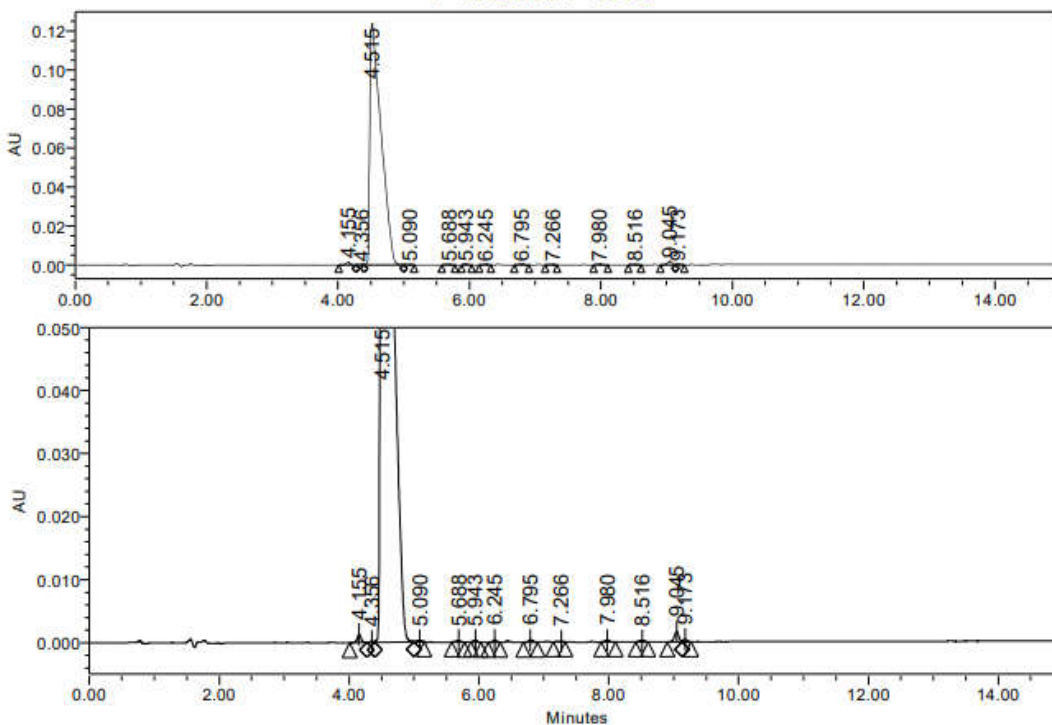

C=0,4mg/ml (50%ACN+0,1%H3PO4)

|     | RT    | Area      | % Area | Height | EP Plate Count | Resolution | Selectivity | Width @ 50% |
|-----|-------|-----------|--------|--------|----------------|------------|-------------|-------------|
| 1   | 4.155 | 5236      | 0.35   | 1312   | 25187          |            |             | 0.062       |
| 2   | 4.356 | 736       | 0.05   | 171    |                |            | 1.08        |             |
| 3   | 4.515 | 1460658   | 98.22  | 123568 | 3093           |            | 1.06        | 0.191       |
| 4   | 5.090 | 1373      | 0.09   | 226    |                |            | 1.19        |             |
| 5   | 5.688 | 1624      | 0.11   | 296    | 23190          |            | 1.17        | 0.088       |
| 6   | 5.943 | 1128      | 0.08   | 297    | 52157          | 2.02       | 1.06        | 0.061       |
| 7   | 6.245 | 1586      | 0.11   | 356    | 46239          | 2.75       | 1.07        | 0.068       |
| 8   | 6.795 | 1801      | 0.12   | 366    | 42970          | 4.46       | 1.12        | 0.077       |
| 9   | 7.266 | 871       | 0.06   | 160    | 30545          | 3.17       | 1.09        | 0.098       |
| 10  | 7.980 | 1377      | 0.09   | 308    | 69741          | 4.99       | 1.13        | 0.071       |
| 11  | 8.516 | 1331      | 0.09   | 235    | 46657          | 3.86       | 1.08        | 0.093       |
| 12  | 9.045 | 7774      | 0.52   | 1646   | 88375          | 3.80       | 1.08        | 0.072       |
| 13  | 9.173 | 1665      | 0.11   | 395    |                |            | 1.02        |             |
| Sum |       | 1487158.9 |        |        |                |            |             |             |

HPLC of 7j

## SAMPLE INFORMATION

|                   |                            |                     |                      |
|-------------------|----------------------------|---------------------|----------------------|
| Sample Name:      | 114-84-VAD-259             | Acquired By:        | System               |
| Sample Type:      | Unknown                    | Sample Set Name:    | 140223_serviss       |
| Vial:             | 27                         | Acq. Method Set:    | Serviss_Gr40%        |
| Injection #:      | 1                          | Processing Method:  | Gr_40%               |
| Injection Volume: | 10.00 ul                   | Channel Name:       | 2998 Ch1 254nm@4.8nm |
| Run Time:         | 25.0 Minutes               | Proc. Chnl. Descr.: | 2998 Ch1 254nm@4.8nm |
| Date Acquired:    | 14.02.2023 11:20:55 AM EET |                     |                      |
| Date Processed:   | 14.02.2023 1:08:31 PM EET  |                     |                      |

Apollo C18-13 5um (4.6x150 mm)  
 15 min Gr. 40-95%ACN + 0.1%H3PO4; 5 min lz. 95%ACN; 2 min Gr. 95-40% ACN; 3 min lz. 40% ACN  
 F=1mL/min. T=40oC.

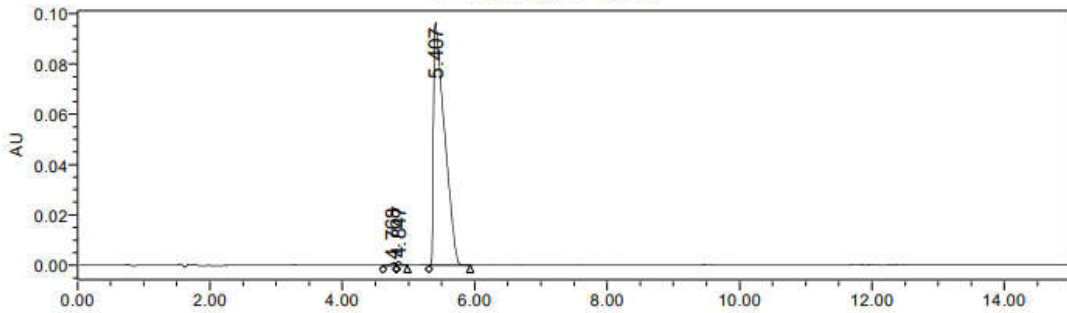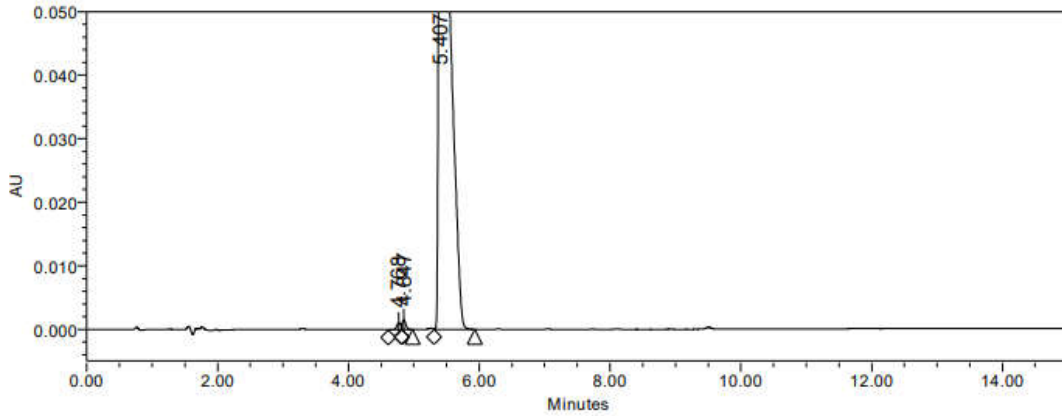

C=0,35mg/ml (50%ACN+0,1%H3PO4)

|     | RT    | Area      | % Area | Height | EP Plate Count | Selectivity | Width @ 50% |
|-----|-------|-----------|--------|--------|----------------|-------------|-------------|
| 1   | 4.768 | 5187      | 0.46   | 1051   |                |             |             |
| 2   | 4.847 | 5759      | 0.51   | 1537   |                | 1.02        |             |
| 3   | 5.407 | 1107586   | 99.02  | 96307  | 4686           | 1.17        | 0.186       |
| Sum |       | 1118531.7 |        |        |                |             |             |

HPLC of 7k

## Therapeutic efficacy of inhibitor **7f** against *P. falciparum* *in vivo*

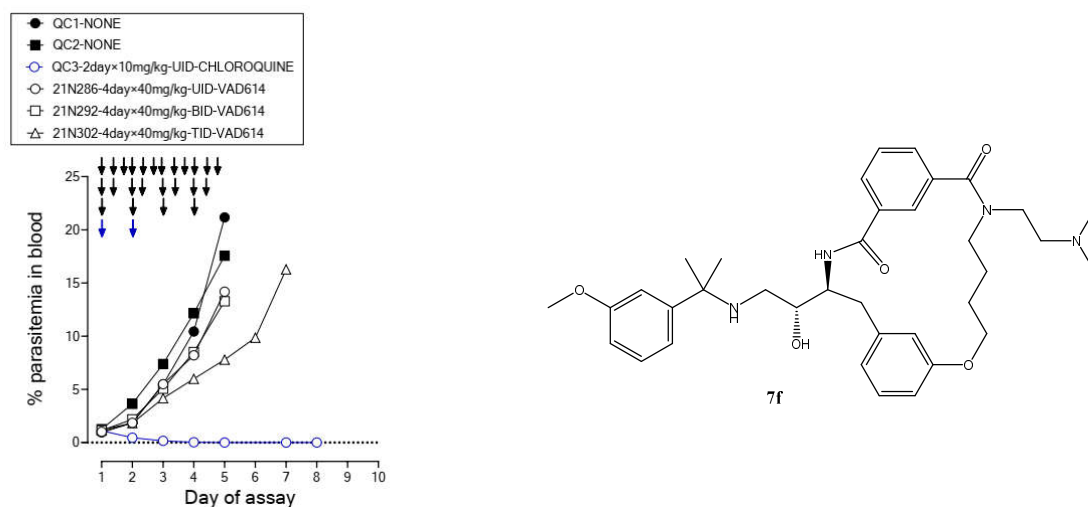

**Figure S1.** Therapeutic efficacy of inhibitor **7f** against *P. falciparum* *in vivo*. The figure shows the parasitemia in peripheral blood of P<sub>falc</sub>HuMice: untreated (QC1 and QC2), treated with chloroquine (QC3) or treated with inhibitor **7f** at 40 mg/kg, p.o., UID, BID or TID, (individuals 21N286, 21N292, and 21N302, respectively). The arrows indicate the time points of drug administration.
